# Supplementary material
Source: Research Square preprint supplement (doi:10.21203/rs.3.rs-8948966/v1)
Supplement: Supplementary file 2 [file b2b9cb10ce67c03cbe5aadf7.xlsx]

## Sheet: Table S1 Collected Germplasm
Species	Germplasm	Screened for SACMV Response	Screened with With CMD Tolerance/Resistance Markers in vitro	Screen for marker polymorphism via GBS-SNP alignment	Genotyped With CMD Tolerance/Resistance Markers in silico		General CMD response Phenotype	SACMV Specific Response Phenotype	Geographic Origin	Organisational Source	Notes
Manihot esculenta						Assembly ID
Manihot esculenta	HighlandSmooth				X	GCA_965363275.1	Tolerant to resistant	Unknown	Thailand	CASSAVASTORE	Hanatee derived
Manihot esculenta	HighlandRough				X	GCA_965363285.1	Tolerant to resistant	Unknown	Thailand	CASSAVASTORE	Hanatee derived
Manihot esculenta	Rayong 90				X	GCA_965364185.1	Mildly tolerant/susceptible	Unknown	Thailand	CASSAVASTORE
Manihot esculenta	Rayong 72				X	GCA_965364345.1	Mildly tolerant/susceptible	Unknown	Thailand	CASSAVASTORE
Manihot esculenta	WhiteRoot				X	GCA_965364695.1	Unknown	Unknown	Thailand	CASSAVASTORE
Manihot esculenta	Rayong 9				X	GCA_965365905.1	Tolerant to resistant	Unknown	Thailand	CASSAVASTORE
Manihot esculenta	CR43.3	X					Unknown	Resistant	West Africa	CIAT
Manihot esculenta	TME3	X	X	X	X	GCA_003957885.1, GCA_003957995.1	Tolerant	Tolerant	Nigeria	CIAT
Manihot esculenta	SC205				X	GCA_013618965.1	Tolerant	Unknown	China	The Cassava Genome Consortium
Manihot esculenta	TMEB117	X	X	X	X	GCA_033783085.1, GCA_033783075.1	Tolerant	Tolerant	Nigeria	IITA
Manihot esculenta subsp. flabellifolia	W14				X	GCA_963409065.1	Tolerant	Unknown	China	The Cassava Genome Consortium	Cultivar of W14
Manihot esculenta	Hanatee				X	GCA_965363265.1	Tolerant to resistant	Unknown	Thailand	CASSAVASTORE
Manihot esculenta	Kasetsart50				X	GCA_965363475.1,GCA_000737115.1	Tolerant	Unknown	Thailand	CASSAVASTORE
Manihot esculenta	YellowRoot				X	GCA_965364235.1	Tolerant	Unknown	Thailand	CASSAVASTORE
Manihot glaziovii	M. glaziovii	X	X		X	GCA_965364665.1	Tolerant	Tolerant	Africa	IITA
Manihot esculenta	AR40.17	X					Tolerant	Tolerant	West Africa	NRCRI
Manihot esculenta	kibaha			X			Tolerant	Unknown	Tanzania	Danforth Center
Manihot esculenta	Ku50		X				Tolerant	Unknown	Vietnam	CIAT
Manihot esculenta	Mkombozi			X			Tolerant	Unknown	Tanzania	IITA
Manihot esculenta	Muzege			X			Tolerant	Unknown	Tanzania	IITA
Manihot esculenta	Nachinyaya			X			Tolerant	Unknown	Tanzania	IITA
Manihot esculenta	Namikonga			X			Tolerant	Unknown	Uganda	IITA
Manihot esculenta	TME1	X	X				Tolerant	Tolerant	Nigeria	IITA
Manihot esculenta	TMS01/1068	X					Tolerant	Tolerant	West Africa	IITA
Manihot esculenta	TMS30572			X			Tolerant	Unknown	Nigeria	NRCRI
Manihot esculenta	TMS98/0002	X		X			Tolerant	Tolerant	Nigeria	IITA
Manihot esculenta	TMS98/0581			X			Tolerant	Unknown	Nigeria	IITA
Manihot esculenta	Ukulinga 2	X					Tolerant	Tolerant	South Africa	Ukulinga Farm
Manihot esculenta	TMS60444	X	X	X	X	GCA_000737105.1 ,GCA_963409055.1	Susceptible	Susceptible	Nigeria	IITA
Manihot esculenta	AM560V8				X	GCA_001659605.2	Susceptible	Unknown	Latin America	DOE-Joint Genome Institute
Manihot esculenta	AR37.80			X			Susceptible	Unknown	Nigeria	IITA
Manihot esculenta	Kiroba			X			Susceptible	Unknown	Uganda	IITA
Manihot esculenta	NDL06142			X			Susceptible	Unknown	Tanzania	IITA
Manihot esculenta	NR8082			X			Susceptible	Unknown	Nigeria	NRCRI
Manihot esculenta	NR8212			X			Susceptible	Unknown	Nigeria	NRCRI
Manihot esculenta	NR87184			X			Susceptible	Unknown	Nigeria	NRCRI
Manihot esculenta	NR930199			X			Susceptible	Unknown	Nigeria	NRCRI
Manihot esculenta	P1/19	X					Susceptible	Susceptible	Southern Africa	ARC
Manihot esculenta	P10/3	X					Susceptible	Susceptible	Southern Africa	ARC
Manihot esculenta	P10/4	X					Susceptible	Susceptible	Southern Africa	ARC
Manihot esculenta	SM1432.4	X					Susceptible	Susceptible	Latin America	CIAT
Manihot esculenta	T200	X	X				Susceptible	Susceptible	South Africa	ARC
Manihot esculenta	Ukulinga 9	X	X				Susceptible	Susceptible	South Africa	Ukulinga Farm
Manihot esculenta	TME204			X	X	GCA_020916425.1, GCA_020916445.1	resistant	Unknown	Nigeria	Danforth Center
Manihot esculenta	Akena			X			resistant	Unknown	Uganda	NACRRI/MARI
Manihot esculenta	Albert			X			resistant	Unknown	Tanzania	NACRRI/MARI
Manihot esculenta	AR17.3	X					resistant	Resistant	West Africa	CIAT
Manihot esculenta	Aulizaye			X			resistant	Unknown	Tanzania	MARI
Manihot esculenta	BRA8565			X			resistant	Unknown	Brazil	CIAT
Manihot esculenta	CM330645			X			resistant	Unknown	Colombia	CIAT
Manihot esculenta	Kibandameno			X			resistant	Unknown	Tanzania	MARI
Manihot esculenta	TME14K			X			resistant	Unknown	Nigeria	Danforth Center
Manihot esculenta	TME419	X		X			resistant	Resistant	Nigeria	IITA
Manihot esculenta	TME7			X			resistant	Unknown	Nigeria	CIAT
Manihot esculenta	TMS01/1412			X			resistant	Unknown	Nigeria	IITA
Manihot esculenta	Me003Vu			X			Resistant	Unknown	Vanuatu	CIRAD
Manihot esculenta	Meoo4Vu			X			Resistant	Unknown	Vanuatu	CIRAD
Manihot esculenta	Sirila 21	X					Resistant	Resistant	Southern Africa	SARRNET
Manihot esculenta	SM707-14	X	X				Resistant	Resistant	Latin America	CIAT
Manihot esculenta	TMS95/0289	X					Resistant	Resistant	Nigeria	IITA
Manihot esculenta	TMS96/1632	X					Resistant	Resistant	Nigeria	IITA
Manihot esculenta	TMS98/05/05	X	X	X			Resistant	resistant	Nigeria	IITA
Manihot esculenta	TMS99/6016			X			Resistant	Unknown	Nigeria	IITA
Manihot esculenta	Ukulinga 8	X	X				Resistant	Resistant	South Africa	Ukulinga Farm
Manihot esculenta	COL40				X	GCA_046055945.1,GCA_046055835.1	Tolerant to resistant	Unknown	Thailand	CASSAVASTORE

## Sheet: Table S2
	Table S2: Consolidated amplicon SNPs of cassava mosaic disease resistance loci markers.
	SNP	SNP Sequence	Parent Marker	Germplasm	Germplasm	Germplasm	Germplasm	Germplasm	Germplasm	Germplasm	Germplasm	Germplasm	Germplasm	Germplasm	Germplasm	Germplasm	Germplasm	Germplasm	Germplasm	Germplasm	Germplasm	Germplasm	Germplasm	Germplasm	Germplasm	Germplasm	Germplasm	Germplasm	Germplasm	Germplasm	Germplasm	Germplasm	Germplasm	Germplasm	Germplasm	Germplasm	Germplasm	Germplasm	Germplasm	Germplasm	Germplasm	Germplasm	Germplasm	Germplasm	Germplasm	Germplasm	Germplasm	Germplasm	Germplasm
	SNP	SNP Sequence	Parent Marker	Akena	Albert	Aulizaye	BRA8565	CM330645	Hanatee	Kibandameno	Me003Vu	Me004Vu	TME14	TME419	TME7	TMEB204	TMS011412	TMS98/05/05	TMS996016	YellowRoot	CR43.3	Ukulinga 8	AM560-2	AR3780	Flabeolfera	Kiroba	NDL06142	NR8082	NR8212	NR87184	NR930199	TMS60444	WhiteRoot	Ukulinga 2	Ukulinga 9	T200	SM1432.3	P119	HighlandRough	HighlandSmooth	Ka50	Kibaha	COL40	Ku50	Mkombozi	Muzege	Nachinyaya	Namikonga	Rayong72
	12:7874158	C	RME1	Absent	Heterozygous	Present	Heterozygous	Absent	Not genotyped	Absent	Absent	Absent	Absent	Absent	Absent	Absent	Absent	Absent	Heterozygous	Not genotyped	Not genotyped	Not genotyped	Absent	Heterozygous	Not genotyped	Absent	Heterozygous	Absent	Heterozygous	Heterozygous	Heterozygous	Heterozygous	Not genotyped	Not genotyped	Not genotyped	Not genotyped	Not genotyped	Not genotyped	Not genotyped	Not genotyped	Not genotyped	Absent	Not genotyped	Not genotyped	Absent	Heterozygous	Heterozygous	Absent	Not genotyped
	12:7874162	T	RME1	Absent	Heterozygous	Present	Heterozygous	Absent	Not genotyped	Absent	Absent	Absent	Absent	Absent	Absent	Absent	Absent	Absent	Heterozygous	Not genotyped	Not genotyped	Not genotyped	Absent	Heterozygous	Not genotyped	Absent	Heterozygous	Absent	Heterozygous	Heterozygous	Heterozygous	Heterozygous	Not genotyped	Not genotyped	Not genotyped	Not genotyped	Not genotyped	Not genotyped	Not genotyped	Not genotyped	Not genotyped	Absent	Not genotyped	Not genotyped	Absent	Heterozygous	Present	Absent	Not genotyped
	12:7874175	T	RME1	Absent	Heterozygous	Present	Heterozygous	Absent	Not genotyped	Absent	Absent	Absent	Absent	Absent	Absent	Absent	Absent	Absent	Heterozygous	Not genotyped	Not genotyped	Not genotyped	Absent	Heterozygous	Not genotyped	Absent	Heterozygous	Absent	Heterozygous	Heterozygous	Heterozygous	Heterozygous	Not genotyped	Not genotyped	Not genotyped	Not genotyped	Not genotyped	Not genotyped	Not genotyped	Not genotyped	Not genotyped	Absent	Not genotyped	Not genotyped	Absent	Heterozygous	Present	Absent	Not genotyped
	12:7874187	T	RME1	Absent	Heterozygous	Present	Heterozygous	Absent	Not genotyped	Absent	Absent	Absent	Absent	Absent	Absent	Absent	Absent	Absent	Heterozygous	Not genotyped	Not genotyped	Not genotyped	Absent	Heterozygous	Not genotyped	Absent	Heterozygous	Absent	Heterozygous	Heterozygous	Heterozygous	Heterozygous	Not genotyped	Not genotyped	Not genotyped	Not genotyped	Not genotyped	Not genotyped	Not genotyped	Not genotyped	Not genotyped	Absent	Not genotyped	Not genotyped	Absent	Heterozygous	Present	Absent	Not genotyped
	12:7874196	C	RME1	Heterozygous	Heterozygous	Present	Heterozygous	Absent	Not genotyped	Heterozygous	Heterozygous	Absent	Heterozygous	Heterozygous	Heterozygous	Heterozygous	Absent	Heterozygous	Present	Not genotyped	Not genotyped	Not genotyped	Absent	Present	Not genotyped	Heterozygous	Present	Heterozygous	Present	Heterozygous	Present	Heterozygous	Not genotyped	Not genotyped	Not genotyped	Not genotyped	Not genotyped	Not genotyped	Not genotyped	Not genotyped	Not genotyped	Absent	Not genotyped	Not genotyped	Absent	Heterozygous	Present	Absent	Not genotyped
	12:7874204	T	RME1	Absent	Heterozygous	Present	Heterozygous	Absent	Not genotyped	Absent	Absent	Absent	Absent	Absent	Absent	Absent	Absent	Absent	Heterozygous	Not genotyped	Not genotyped	Not genotyped	Absent	Heterozygous	Not genotyped	Absent	Heterozygous	Absent	Heterozygous	Heterozygous	Heterozygous	Heterozygous	Not genotyped	Not genotyped	Not genotyped	Not genotyped	Not genotyped	Not genotyped	Not genotyped	Not genotyped	Not genotyped	Absent	Not genotyped	Not genotyped	Absent	Heterozygous	Present	Absent	Not genotyped
	12:7874224	G	RME1	Absent	Heterozygous	Present	Heterozygous	Absent	Not genotyped	Absent	Absent	Absent	Absent	Absent	Absent	Absent	Absent	Absent	Heterozygous	Not genotyped	Not genotyped	Not genotyped	Absent	Heterozygous	Not genotyped	Absent	Heterozygous	Absent	Heterozygous	Heterozygous	Heterozygous	Heterozygous	Not genotyped	Not genotyped	Not genotyped	Not genotyped	Not genotyped	Not genotyped	Not genotyped	Not genotyped	Not genotyped	Absent	Not genotyped	Not genotyped	Absent	Heterozygous	Present	Absent	Not genotyped
	12:7874235	T	RME1	Heterozygous	Absent	Absent	Absent	Absent	Not genotyped	Heterozygous	Heterozygous	Absent	Heterozygous	Heterozygous	Heterozygous	Heterozygous	Absent	Heterozygous	Heterozygous	Not genotyped	Not genotyped	Not genotyped	Absent	Heterozygous	Not genotyped	Heterozygous	Heterozygous	Heterozygous	Heterozygous	Absent	Heterozygous	Absent	Not genotyped	Not genotyped	Not genotyped	Not genotyped	Not genotyped	Not genotyped	Not genotyped	Not genotyped	Not genotyped	Absent	Not genotyped	Not genotyped	Absent	Absent	Absent	Absent	Not genotyped
	12:7731809	T	NS169	Absent	Absent	Absent	Absent	Absent	Absent	Absent	Absent	Absent	Absent	Absent	Absent	Absent	Absent	Absent	Heterozygous	Absent	Heterozygous	Absent	Absent	Heterozygous	Absent	Absent	Heterozygous	Absent	Heterozygous	Heterozygous	Heterozygous	Heterozygous	Heterozygous	Absent	Absent	Heterozygous	Heterozygous	Absent	Absent	Absent	Absent	Absent	Absent	Absent	Absent	Absent	Absent	Absent	Absent
	12:7731815	G/A	NS169	Absent	Absent	Absent	Absent	Absent	Absent	Absent	Absent	Absent	Absent	Absent	Absent	Absent	Absent	Absent	Heterozygous	Absent	Heterozygous	Heterozygous	Absent	Heterozygous	Heterozygous	Absent	Heterozygous	Absent	Heterozygous	Heterozygous	Heterozygous	Heterozygous	Present	Absent	Heterozygous	Heterozygous	Heterozygous	Heterozygous	Absent	Absent	Absent	Absent	Absent	Absent	Absent	Absent	Absent	Absent	Absent
	12:7731850	C	NS169	Absent	Absent	Absent	Absent	Absent	Absent	Absent	Absent	Absent	Absent	Absent	Absent	Absent	Absent	Absent	Heterozygous	Absent	Absent	Heterozygous	Absent	Heterozygous	Heterozygous	Absent	Heterozygous	Absent	Heterozygous	Heterozygous	Heterozygous	Heterozygous	Heterozygous	Absent	Heterozygous	Absent	Absent	Absent	Absent	Absent	Absent	Absent	Absent	Absent	Absent	Absent	Absent	Absent	Absent
	12:7731928	G	NS169	Absent	Absent	Absent	Absent	Absent	Absent	Absent	Absent	Absent	Absent	Absent	Absent	Absent	Absent	Absent	Heterozygous	Absent	Absent	Absent	Absent	Heterozygous	Heterozygous	Absent	Heterozygous	Absent	Heterozygous	Absent	Heterozygous	Heterozygous	Absent	Absent	Absent	Absent	Absent	Absent	Absent	Absent	Absent	Absent	Absent	Absent	Absent	Absent	Absent	Absent	Absent
	12:7731941	G	NS169	Heterozygous	Heterozygous	Present	Present	Absent	Absent	Heterozygous	Heterozygous	Absent	Heterozygous	Heterozygous	Heterozygous	Heterozygous	Absent	Heterozygous	Heterozygous	Heterozygous	Absent	Absent	Absent	Heterozygous	Absent	Heterozygous	Heterozygous	Heterozygous	Heterozygous	Absent	Heterozygous	Absent	Absent	Heterozygous	Heterozygous	Heterozygous	Absent	Heterozygous	Absent	Heterozygous	Heterozygous	Absent	Heterozygous	Absent	Absent	Absent	Present	Absent	Heterozygous
	12:7731945	T	NS169	Absent	Absent	Absent	Absent	Absent	Absent	Absent	Absent	Absent	Absent	Absent	Absent	Absent	Absent	Absent	Heterozygous	Absent	Heterozygous	Heterozygous	Absent	Heterozygous	Absent	Absent	Heterozygous	Absent	Heterozygous	Absent	Heterozygous	Heterozygous	Absent	Absent	Heterozygous	Absent	Heterozygous	Heterozygous	Absent	Absent	Absent	Absent	Absent	Absent	Absent	Absent	Absent	Absent	Absent
	12:7731809	T	NS158	Absent	Absent	Absent	Absent	Absent	Absent	Absent	Absent	Absent	Absent	Absent	Absent	Absent	Absent	Absent	Heterozygous	Absent	Heterozygous	Absent	Absent	Heterozygous	Absent	Absent	Heterozygous	Absent	Heterozygous	Heterozygous	Heterozygous	Heterozygous	Heterozygous	Absent	Absent	Heterozygous	Heterozygous	Absent	Absent	Absent	Absent	Absent	Absent	Absent	Absent	Absent	Absent	Absent	Absent
	12:7731815	G/A	NS158	Absent	Absent	Absent	Absent	Absent	Absent	Absent	Absent	Absent	Absent	Absent	Absent	Absent	Absent	Absent	Heterozygous	Absent	Heterozygous	Heterozygous	Absent	Heterozygous	Heterozygous	Absent	Heterozygous	Absent	Heterozygous	Heterozygous	Heterozygous	Heterozygous	Present	Absent	Heterozygous	Heterozygous	Heterozygous	Heterozygous	Absent	Absent	Absent	Absent	Absent	Absent	Absent	Absent	Absent	Absent	Absent
	12:7541095	G	SSRY28	Absent	Heterozygous	Heterozygous	Absent	Absent	Absent	Absent	Absent	Absent	Absent	Absent	Absent	Absent	Absent	Absent	Heterozygous	Absent	Heterozygous	Absent	Absent	Heterozygous	Heterozygous	Absent	Heterozygous	Absent	Heterozygous	Heterozygous	Heterozygous	Heterozygous	Heterozygous	Heterozygous	Heterozygous	Heterozygous	Absent	Heterozygous	Absent	Absent	Absent	Absent	Absent	Absent	Absent	Absent	Heterozygous	Absent	Absent
	12:7541180	G	SSRY28	Absent	Heterozygous	Heterozygous	Heterozygous	Absent	Heterozygous	Absent	Absent	Absent	Absent	Absent	Absent	Absent	Absent	Absent	Heterozygous	Absent	Heterozygous	Absent	Absent	Heterozygous	Absent	Absent	Heterozygous	Absent	Heterozygous	Absent	Heterozygous	Heterozygous	Absent	Absent	Absent	Absent	Heterozygous	Absent	Heterozygous	Heterozygous	Absent	Absent	Present	Absent	Absent	Absent	Heterozygous	Absent	Heterozygous
	1:32767646	C/A	SSRY40	Absent	Absent	Absent	Absent	Absent	Absent	Absent	Absent	Absent	Absent	Absent	Absent	Absent	Absent	Absent	Heterozygous	Absent	Absent	Absent	Absent	Absent	Absent	Heterozygous	Absent	Heterozygous	Heterozygous	Heterozygous	Absent	Absent	Absent	Absent	Absent	Absent	Absent	Absent	Absent	Absent	Absent	Absent	Absent	Absent	Absent	Heterozygous	Absent	Heterozygous	Absent
	1:32767693	C/G	SSRY40	Absent	Absent	Absent	Absent	Absent	Absent	Absent	Absent	Absent	Absent	Absent	Absent	Absent	Absent	Absent	Heterozygous	Absent	Absent	Absent	Absent	Absent	Heterozygous	Heterozygous	Absent	Heterozygous	Heterozygous	Heterozygous	Absent	Absent	Absent	Absent	Absent	Absent	Absent	Absent	Absent	Absent	Absent	Absent	Absent	Absent	Absent	Heterozygous	Absent	Heterozygous	Absent
	1:32767695	T	SSRY40	Heterozygous	Absent	Heterozygous	Absent	Absent	Absent	Absent	Heterozygous	Absent	Heterozygous	Absent	Absent	Absent	Absent	Heterozygous	Absent	Absent	Absent	Absent	Absent	Absent	Absent	Absent	Absent	Absent	Absent	Absent	Absent	Absent	Absent	Absent	Absent	Absent	Absent	Absent	Absent	Absent	Absent	Absent	Absent	Absent	Heterozygous	Absent	Heterozygous	Absent	Absent
	1:32767731	G	SSRY40	Absent	Heterozygous	Absent	Absent	Absent	Absent	Heterozygous	Absent	Heterozygous	Absent	Absent	Heterozygous	Absent	Absent	Absent	Absent	Absent	Absent	Absent	Absent	Absent	Absent	Absent	Absent	Absent	Absent	Absent	Absent	Absent	Absent	Absent	Absent	Absent	Absent	Absent	Absent	Absent	Absent	Absent	Absent	Absent	Absent	Absent	Absent	Absent	Absent
	1:32767743	G	SSRY40	Heterozygous	Heterozygous	Heterozygous	Absent	Absent	Absent	Heterozygous	Heterozygous	Heterozygous	Heterozygous	Heterozygous	Heterozygous	Heterozygous	Heterozygous	Heterozygous	Absent	Absent	Absent	Absent	Absent	Absent	Absent	Absent	Absent	Absent	Heterozygous	Heterozygous	Absent	Heterozygous	Absent	Absent	Absent	Absent	Absent	Absent	Absent	Absent	Absent	Absent	Present	Absent	Absent	Heterozygous	Absent	Heterozygous	Absent
	1:32767748	C	SSRY40	Absent	Absent	Absent	Absent	Absent	Absent	Absent	Absent	Absent	Absent	Absent	Absent	Absent	Absent	Absent	Heterozygous	Absent	Absent	Absent	Absent	Absent	Heterozygous	Heterozygous	Absent	Heterozygous	Heterozygous	Heterozygous	Absent	Absent	Absent	Absent	Absent	Absent	Absent	Absent	Absent	Absent	Absent	Absent	Absent	Absent	Absent	Heterozygous	Absent	Heterozygous	Absent
	1:32767772	C	SSRY40	Absent	Absent	Absent	Absent	Absent	Absent	Absent	Absent	Absent	Absent	Absent	Absent	Absent	Absent	Absent	Heterozygous	Absent	Absent	Absent	Absent	Absent	Absent	Heterozygous	Absent	Heterozygous	Heterozygous	Heterozygous	Absent	Absent	Absent	Absent	Absent	Absent	Absent	Absent	Absent	Absent	Absent	Absent	Absent	Absent	Absent	Absent	Absent	Heterozygous	Absent
	1:32767785	G	SSRY40	Present	Heterozygous	Present	Absent	Absent	Absent	Present	Present	Present	Present	Heterozygous	Heterozygous	Heterozygous	Heterozygous	Heterozygous	Absent	Absent	Absent	Absent	Absent	Absent	Absent	Absent	Absent	Absent	Heterozygous	Heterozygous	Absent	Heterozygous	Absent	Absent	Absent	Absent	Absent	Absent	Absent	Absent	Absent	Present	Absent	Absent	Heterozygous	Heterozygous	Heterozygous	Heterozygous	Absent
	1:32767791	T	SSRY40	Absent	Absent	Absent	Absent	Absent	Heterozygous	Absent	Absent	Absent	Absent	Absent	Absent	Absent	Absent	Absent	Absent	Absent	Absent	Absent	Absent	Absent	Heterozygous	Heterozygous	Absent	Heterozygous	Heterozygous	Heterozygous	Absent	Heterozygous	Heterozygous	Absent	Absent	Absent	Absent	Absent	Heterozygous	Absent	Heterozygous	Absent	Present	Absent	Absent	Absent	Absent	Absent	Absent
	1:32767827	A	SSRY40	Present	Heterozygous	Present	Absent	Absent	Absent	Present	Present	Present	Present	Heterozygous	Present	Heterozygous	Heterozygous	Present	Heterozygous		Heterozygous	Heterozygous			Heterozygous	Absent	Absent	Absent	Absent	Absent	Absent	Heterozygous	Absent	Absent	Absent	Absent	Heterozygous	Heterozygous	Absent	Absent	Absent	Present	Absent	Absent	Heterozygous	Present	Heterozygous	Present	Absent
	1:32767849	G	SSRY40	Heterozygous	Absent	Heterozygous	Absent	Absent	Heterozygous	Absent	Heterozygous	Absent	Heterozygous	Absent	Absent	Absent	Absent	Heterozygous	Absent	Absent	Absent	Absent	Absent	Absent	Heterozygous	Absent	Absent	Absent	Absent	Absent	Absent	Absent	Absent	Absent	Absent	Absent	Absent	Absent	Heterozygous	Absent	Heterozygous	Absent	Present	Absent	Heterozygous	Absent	Heterozygous	Absent	Absent
	12:1353228	T	NS198	Absent	Absent	Absent	Absent	Absent	Absent	Absent	Absent	Absent	Heterozygous	Heterozygous	Heterozygous	Heterozygous	Absent	Heterozygous	Absent	Heterozygous	Heterozygous	Heterozygous	Absent	Absent	Absent	Absent	Absent	Absent	Absent	Absent	Absent	Heterozygous	Absent	Absent	Absent	Absent	Absent	Absent	Absent	Heterozygous	Heterozygous	Absent	Absent	Absent	Absent	Absent	Absent	Absent	Heterozygous
	12:1353243	A	NS198	Absent	Absent	Absent	Absent	Absent	Absent	Absent	Absent	Heterozygous	Absent	Absent	Absent	Absent	Absent	Absent	Absent	Absent	Absent	Absent	Absent	Heterozygous	Present	Present	Absent	Absent	Absent	Absent	Absent	Heterozygous	Absent	Absent	Absent	Absent	Absent	Absent	Absent	Absent	Absent	Absent	Absent	Absent	Absent	Absent	Absent	Absent	Absent
	12:1353305	C	NS198	Absent	Absent	Absent	Absent	Absent	Absent	Absent	Absent	Absent	Absent	Absent	Absent	Absent	Present	Absent	Absent	Absent	Absent	Absent	Absent	Absent	Absent	Absent	Absent	Present	Present	Present	Present	Heterozygous	Present	Present	Present	Present	Present	Present	Absent	Absent	Absent	Absent	Absent	Absent	Absent	Present	Absent	Absent	Absent
	Table Legend
	SNPs were derived from a combination of amplicon band Sanger sequencing (SRA: PRJNA1420052), in silico PCR against cassava genome assemblies available on NCBI (https://www.ncbi.nlm.nih.gov/datasets/genome/?taxon=3982), and variant calling against marker genomic loci via Phytozome, Jbrowse (https://phytozome-next.jgi.doe.gov/jbrowse/index.html?data=genomes%2FMesculenta_v8_1)
[truncated: 9 more columns]

## Sheet: Table S3
	Table S2: Chi-squared test for independence between cassava mosaic disease resistance marker amplicon sequence polymorphism and cassava mosaic disease response phenotype.
	Marker	SNP	Susceptible vs Tolerant vs Resistant						Susceptible vs Non-Susceptible						Selected for elimination of susceptibility associated amplicons.
			χ2 test statistic	P value				Expected frequencies > 5	χ2 test statistic	P value
			χ2 test statistic	Unadjusted	Monte-Carlo	Continuity Corrected	Rescaled		χ2 test statistic	Unadjusted	Monte-Carlo	Continuity Corrected	Rescaled	Expected frequencies > 5
	NS169	Chr12.7731809	13.2984	0.00129508	0.001999	0.00129508	0.00129508		13.2969	0.000976941	0.00049975	0.000976941	0.000976941
	NS169	Chr12.7731815	20.6933	3.20996e-05	0.00049975	3.20996e-05	3.20996e-05		20.5404	2.54321e-05	0.00049975	2.54321e-05	2.54321e-05	X	X
	NS169	Chr12.7731850	13.2984	0.00129508	0.00149925	0.00129508	0.00129508		13.2969	0.000976941	0.001999	0.000976941	0.000976941
	NS169	Chr12.7731856	8.79687	0.0122966	0.0129935	0.0122966	0.0122966		8.68883	0.00936919	0.00649675	0.00936919	0.00936919	X
	NS169	Chr12.7731941	1.4364	0.487628	0.505747	0.487628	0.487628		0.0587607	1	1	1	1
	NS169	Chr12.7731945	8.86977	0.0118564	0.0149925	0.0118564	0.0118564		8.68883	0.00936919	0.007996	0.00936919	0.00936919
	NS158	Chr12.7731809	13.2984	0.00129508	0.00249875	0.00129508	0.00129508		13.2969	0.000976941	0.001999	0.000976941	0.000976941
	NS158	Chr12.7731815	20.6933	3.20996e-05	0.00049975	3.20996e-05	3.20996e-05		20.5404	2.54321e-05	0.00049975	2.54321e-05	2.54321e-05	X	X
	SSRY28	Chr12.7541095	16.4892	0.000262672	0.00049975	0.000262672	0.000262672	X	16.3313	0.000192215	0.00049975	0.000192215	0.000192215	X	X
	SSRY28	Chr12.7541180	0.311184	0.855908	0.881559	0.855908	0.855908		0.0125916	1	1	1	1
	SSRY40	Chr1.32767646	3.25658	0.196265	0.215392	0.196265	0.196265		0.705128	0.649219	0.452274	0.649219	0.649219		X
	SSRY40	Chr1.32767693	4.67204	0.0967117	0.103948	0.0967117	0.0967117		1.17675	0.468228	0.290855	0.468228	0.468228
	SSRY40	Chr1.32767695	4.6987	0.095431	0.0954523	0.095431	0.095431		4.41472	0.089156	0.0504748	0.089156	0.089156		X
	SSRY40	Chr1.32767731	3.98765	0.136174	0.154423	0.136174	0.136174		2.76295	0.235599	0.175412	0.235599	0.235599
	SSRY40	Chr1.32767743	8.14829	0.0170068	0.017991	0.0170068	0.0170068		3.60971	0.110851	0.069965	0.110851	0.110851
	SSRY40	Chr1.32767748	4.67204	0.0967117	0.095952	0.0967117	0.0967117		1.17675	0.468228	0.315342	0.468228	0.468228
	SSRY40	Chr1.32767772	3.25658	0.196265	0.225387	0.196265	0.196265		0.705128	0.649219	0.451274	0.649219	0.649219
	SSRY40	Chr1.32767785	7.08272	0.028974	0.0374813	0.028974	0.028974		4.93506	0.0547875	0.0389805	0.0547875	0.0547875	X	X
	SSRY40	Chr1.32767791	7.60324	0.0223345	0.017991	0.0223345	0.0223345		6.36272	0.030539	0.0154923	0.030539	0.030539
	SSRY40	Chr1.32767827	12.4216	0.0144765	0.0104948	0.0144765	0.0144765		7.6514	0.0218032	0.031984	0.0218032	0.0218032
	SSRY40	Chr1.32767849	3.79238	0.150139	0.173413	0.150139	0.150139		3.77893	0.110814	0.0829585	0.110814	0.110814
	NS198	Chr12.1353228	7.2219	0.0270261	0.0289855	0.0270261	0.0270261		7.18482	0.0180745	0.0149925	0.0180745	0.0180745	X	X
	NS198	Chr12.1353243	2.72729	0.255727	0.321839	0.255727	0.255727		1.98411	0.323378	0.209395	0.323378	0.323378		X
	NS198	Chr12.1353305	22.4055	1.36365e-05	0.00049975	1.36365e-05	1.36365e-05		22.2903	1.18414e-05	0.00049975	1.18414e-05	1.18414e-05		X

## Sheet: Table S4
		Table S3: Relative accuracy of size and sequence based marker genotyping for cassava mosaic disease response associated molecular markers
		Marker	SNPs		By Marker Sequence					By Marker Presence
			Position	Sequence	Positive	False Positive	Negative	False Negative	False Discovery Rate	False Negative Rate	Positive	False Positive	False Discovery Rate
		SSRY40	Chr1:32767695	C-T	29	4	26	11	0.138	0.423077	55	16	0.291
		NS169	Chr12:7731815	C-G/A	38	4	17	5	0.105263	0.294118	55	16	0.291
		NS158	Chr12:7731815	C-G/A	38	4	17	5	0.105	0.294118	55	16	0.291
		SSRY28	Chr12:7541095	A-G	36	4	19	7	0.111	0.368421	55	16	0.291
		NS198	Chr12:1353228	C-T	39	3	16	4	0.077	0.25	55	16	0.291
		NS198	Chr12:1353243	C-A	39	3	16	4	0.077	0.25	55	16	0.291
		NS198	Chr12:1353305	G-C	39	3	16	4	0.077	0.25	55	16	0.291

## Sheet: Table S5
		Table S5: Marker loci identified in genome assemblies of Manihot germplasm.
		Marker	Parent Scaffold	Start location (bp)	End location (bp)	Primer Sequence match	Amplicon Sequence Match		Table Legend
		SSRY40	AM560V8_Chr01	41013650	41014091		X		Primer sequences matches were determined by >90% sequence homology to both the forward, and the reverse primers for the respective marker. Amplicon Sequence matches were determined by >90% sequence homology to the consensus sequence of CMD QTL linked marker amplicons
		RME1_A2	COL40_H1_Chr01	9768471	9769045		X
		RME1_A2	COL40_H1_Chr01	42468647	42469229		X
		SSRY40	COL40_H1_Chr01	41838262	41838659		X
		RME1_A2	COL40_H2_Chr01	40819907	40820489		X
		SSRY40	COL40_H2_Chr01	40219383	40219780		X
		RME1_A2	Glaziovii_Chr01	17744320	17744894		X
		RME1_A2	Glaziovii_Chr01	1135733	1136360		X
		SSRY40	Glaziovii_Chr01	60293480	60293915		X
		SSRY40	Hanatee_Chr01	30987085	30987484		X
		SSRY40	HighLandRough_Chr01	31991951	31992350		X
		SSRY40	HighLandSmooth_Chr01	31071012	31071453		X
		SSRY40	Kasetsart50_Chr01	32804645	32805084		X
		SSRY40	Rayong72_Chr01	37977768	37978207		X
		RME1_A2	Rayong9_Chr01	29948212	29948794		X
		SSRY40	Rayong9_Chr01	29365081	29365520		X
		RME1_A2	Rayong90_Chr01	43192538	43193120		X
		SSRY40	Rayong90_Chr01	42615747	42616186		X
		RME1_A2	SC205_Chr01	14012874	14013463		X
		RME1_A2	SC205_Chr01	20621525	20622059		X
		SSRY40	SC205_Chr01	41167904	41168327		X
		RME1_A2	TMEB204_H1_Chr01	43206238	43206820		X
		SSRY40	TMEB204_H1_Chr01	42653825	42654266		X
		RME1_A2	TMEB204_H2_Chr01	9256638	9257239		X
		SSRY40	TMEB204_H2_Chr01	41651110	41651509		X
		SSRY40	WhiteRoot_Chr01	39529416	39529815		X
		RME1_A2	YellowRoot_Chr01	9047661	9048235		X
		SSRY40	YellowRoot_Chr01	34598579	34599014		X
		SSRY40	TMEB117_H1_Chr01	41502489	41502912		X
		SSRY40	TMEB117_H2_Chr01	41030276	41030675		X
		RME1_A1	COL40_H1_Chr02	15456873	15457783		X
		RME1_A1	COL40_H2_Chr02	15050284	15051194		X
		RME1_A1	COL40_H2_Chr02	19794144	19795024		X
		RME1_A2	COL40_H2_Chr02	24361538	24362160		X
		RME1_A1	Glaziovii_Chr02	20347695	20348605		X
		RME1_A2	HighLandSmooth_Chr02	20518956	20519578		X
		RME1_A2	Rayong72_Chr02	20340377	20340998		X
		RME1_A2	SC205_Chr02	17750155	17750764		X
		RME1_A2	SC205_Chr02	8862426	8863110		X
		RME1_A1	TMEB204_H1_Chr02	15039630	15040540		X
		RME1_A1	TMEB204_H1_Chr02	19945151	19946031		X
		RME1_A2	COL40_H1_Chr03	16496082	16496730		X
		RME1_A2	COL40_H1_Chr03	25164701	25165325		X
		RME1_A2	COL40_H1_Chr03	19411046	19411657		X
		RME1_A1	COL40_H2_Chr03	24791082	24791912		X
		RME1_A2	COL40_H2_Chr03	16415824	16416472		X
		RME1_A2	COL40_H2_Chr03	19311270	19311881		X
		RME1_A1	Glaziovii_Chr03	30391038	30391864		X
		RME1_A2	Glaziovii_Chr03	22023697	22024345		X
		RME1_A2	Glaziovii_Chr03	24944984	24945595		X
		RME1_A2	Hanatee_Chr03	21012673	21013297		X
		RME1_A1	HighLandRough_Chr03	21280376	21281203		X
		RME1_A2	HighLandRough_Chr03	16411871	16412519		X
		RME1_A2	HighLandRough_Chr03	21089803	21090427		X
		RME1_A2	HighLandSmooth_Chr03	17151684	17152331		X
		RME1_A2	HighLandSmooth_Chr03	20066270	20066881		X
		RME1_A1	Kasetsart50_Chr03	24492828	24493654		X
		RME1_A2	Rayong72_Chr03	7849695	7850308		X
		RME1_A2	Rayong72_Chr03	16489972	16490619		X
		RME1_A2	Rayong72_Chr03	19424232	19424843		X
		RME1_A2	Rayong9_Chr03	229980	230567		X
		RME1_A2	Rayong9_Chr03	7609607	7610220		X
		RME1_A2	Rayong9_Chr03	18668760	18669371		X
		RME1_A1	Rayong90_Chr03	22852680	22853506		X
		RME1_A2	Rayong90_Chr03	7845560	7846173		X
		RME1_A2	SC205_Chr03	7405623	7406236		X
		RME1_A2	SC205_Chr03	16806403	16807051		X
		RME1_A2	SC205_Chr03	19739407	19740018		X
		RME1_A2	SC205_Chr03	753428	754028		X
		RME1_A2	TMEB204_H1_Chr03	15785198	15785840		X
		RME1_A2	TMEB204_H2_Chr03	17034682	17035330		X
		RME1_A2	TMEB204_H2_Chr03	25304203	25304827		X
		RME1_A2	TMEB204_H2_Chr03	19956435	19957046		X
		RME1_A1	WhiteRoot_Chr03	22364618	22365444		X
		RME1_A2	WhiteRoot_Chr03	16639339	16639986		X
		RME1_A2	WhiteRoot_Chr03	22174058	22174682		X
		RME1_A1	YellowRoot_Chr03	26322081	26322908		X
		RME1_A2	COL40_H2_Chr04	32413846	32414522		X
		RME1_A2	COL40_H2_Chr04	30526805	30527444		X
		RME1_A2	COL40_H2_Chr04	23007711	23008419		X
		RME1_A2	Hanatee_Chr04	3206944	3207532		X
		RME1_A2	HighLandRough_Chr04	3509398	3509987		X
		RME1_A2	HighLandSmooth_Chr04	3302785	3303373		X
		RME1_A2	Kasetsart50_Chr04	22917129	22917768		X
		RME1_A2	Kasetsart50_Chr04	15677136	15677796		X
		RME1_A2	Rayong72_Chr04	3075922	3076510		X
		RME1_A2	Rayong72_Chr04	15558800	15559370		X
		RME1_A2	Rayong90_Chr04	3668209	3668796		X
		RME1_A2	Rayong90_Chr04	21684657	21685317		X
		RME1_A2	SC205_Chr04	19945135	19945801		X
		RME1_A2	SC205_Chr04	16995536	16996106		X
		RME1_A2	TMEB204_H1_Chr04	29682758	29683397		X
		RME1_A2	TMEB204_H1_Chr04	3160513	3161101		X
		RME1_A2	TMEB204_H2_Chr04	18845198	18845768		X
		RME1_A2	WhiteRoot_Chr04	24501901	24502540		X
		RME1_A2	WhiteRoot_Chr04	3590426	3591014		X
		RME1_A2	YellowRoot_Chr04	25596116	25596755		X
		RME1_A2	COL40_H1_Chr05	13496123	13496714		X
		RME1_A2	COL40_H1_Chr05	14793972	14794619		X
		RME1_A2	COL40_H2_Chr05	13186225	13186816		X
		RME1_A2	COL40_H2_Chr05	21966089	21966623		X
		RME1_A2	Glaziovii_Chr05	21121241	21121832		X
		RME1_A2	Glaziovii_Chr05	29884298	29884832		X
		RME1_A2	Hanatee_Chr05	14241288	14241879		X
		RME1_A2	HighLandRough_Chr05	14127062	14127653		X
		RME1_A2	HighLandSmooth_Chr05	14473289	14473880		X
		RME1_A2	HighLandSmooth_Chr05	22979806	22980340		X
		RME1_A2	Kasetsart50_Chr05	33555716	33556313		X
		RME1_A2	Rayong72_Chr05	31674800	31675397		X
		RME1_A2	Rayong72_Chr05	14320186	14320777		X
		RME1_A2	Rayong72_Chr05	15631850	15632497		X
		RME1_A2	Rayong9_Chr05	13588780	13589371		X
		RME1_A2	Rayong9_Chr05	14905090	14905737		X
		RME1_A2	Rayong90_Chr05	15325193	15325784		X
		RME1_A2	Rayong90_Chr05	23156610	23157173		X
		RME1_A2	Rayong90_Chr05	11399956	11400539		X
		RME1_A2	Rayong90_Chr05	16614190	16614837		X
		RME1_A2	SC205_Chr05	14012874	14013463		X
		RME1_A2	SC205_Chr05	20621525	20622059		X
		RME1_A2	SC205_Chr05	22293714	22294277		X
		RME1_A2	TMEB204_H1_Chr05	12916397	12916972		X
		RME1_A2	TMEB204_H2_Chr05	22387346	22387880		X
		RME1_A2	WhiteRoot_Chr05	14296725	14297316		X
		RME1_A2	WhiteRoot_Chr05	18216801	18217365		X
		RME1_A2	WhiteRoot_Chr05	15618856	15619503		X
		RME1_A2	YellowRoot_Chr05	10997147	10997730		X
		RME1_A2	YellowRoot_Chr05	18944889	18945423		X
		RME1_A2	COL40_H1_Chr06	10406474	10407101		X
		RME1_A1	COL40_H2_Chr06	10074047	10074943		X
		RME1_A2	COL40_H2_Chr06	14240096	14240740		X
		RME1_A2	COL40_H2_Chr06	9724865	9725492		X
		RME1_A2	Glaziovii_Chr06	10027150	10027787		X
		RME1_A2	Glaziovii_Chr06	14032179	14032713		X
		RME1_A2	Hanatee_Chr06	10221946	10222522		X
		RME1_A2	Hanatee_Chr06	2161172	2161754		X
		RME1_A2	HighLandRough_Chr06	10212140	10212716		X
		RME1_A2	HighLandRough_Chr06	2088949	2089530		X
		RME1_A2	HighLandRough_Chr06	10091810	10092447		X
		RME1_A2	HighLandSmooth_Chr06	10476620	10477197		X
		RME1_A2	HighLandSmooth_Chr06	2170946	2171525		X
		RME1_A2	Kasetsart50_Chr06	2185041	2185623		X
		RME1_A2	Kasetsart50_Chr06	11092413	11093039		X
		RME1_A2	Rayong72_Chr06	10103566	10104142		X
		RME1_A2	Rayong72_Chr06	9546573	9547200		X
		RME1_A2	Rayong72_Chr06	9429211	9429837		X
		RME1_A2	Rayong9_Chr06	2200660	2201242		X
		RME1_A2	Rayong9_Chr06	10424617	10425243		X
		RME1_A2	Rayong90_Chr06	11321890	11322516		X
		RME1_A2	SC205_Chr06	12279532	12280119		X
		RME1_A2	TMEB204_H1_Chr06	10180457	10181095		X
		RME1_A2	TMEB204_H2_Chr06	22387346	22387880		X
		RME1_A2	TMEB204_H2_Chr06	10612890	10613468		X
		RME1_A2	TMEB204_H2_Chr06	2053412	2053995		X
		RME1_A2	WhiteRoot_Chr06	8700922	8701498		X
		RME1_A2	WhiteRoot_Chr06	8581379	8582017		X
		RME1_A2	YellowRoot_Chr06	2283038	2283620		X
		RME1_A2	YellowRoot_Chr06	16468221	16468862		X
		RME1_A2	YellowRoot_Chr06	11726212	11726838		X
		SSRY40	SC205_Chr07	34967904	34968327		X
		RME1_A2	TMEB204_H1_Chr07	10180457	10181095		X
		RME1_A2	TMEB204_H2_Chr07	10612890	10613468		X
		RME1_A2	TMEB204_H2_Chr07	2053412	2053995		X
		RME1_A2	YellowRoot_Chr07	18898534	18899141		X
		RME1_A2	COL40_H1_Chr08	17128912	17129486		X
		RME1_A2	Glaziovii_Chr08	2189401	2190017		X
		RME1_A2	Glaziovii_Chr08	18713837	18714445		X
		RME1_A2	HighLandSmooth_Chr08	10881404	10882093		X
		RME1_A2	Rayong72_Chr08	9345861	9346549		X
		RME1_A2	SC205_Chr08	17750155	17750764		X
		RME1_A2	SC205_Chr08	8862426	8863110		X
		RME1_A2	SC205_Chr08	5015666	5016315		X
		RME1_A2	SC205_Chr08	19892307	19892903		X
		RME1_A2	SC205_Chr08	14676035	14676606		X
		RME1_A2	SC205_Chr08	14936733	14937311		X
		RME1_A2	TMEB204_H1_Chr08	18284914	18285523		X
		RME1_A2	TMEB204_H1_Chr08	16744994	16745568		X
		RME1_A2	WhiteRoot_Chr08	9938918	9939606		X
		RME1_A2	COL40_H1_Chr09	26131760	26132395		X
		RME1_A2	COL40_H1_Chr09	28303103	28303724		X
		RME1_A2	COL40_H1_Chr09	39539556	39540105		X
		RME1_A2	COL40_H2_Chr09	20861530	20862128		X
		RME1_A2	COL40_H2_Chr09	37059733	37060282		X
		RME1_A2	Kasetsart50_Chr09	17306028	17306626		X
		RME1_A2	Rayong9_Chr09	22533603	22534224		X
		RME1_A2	Rayong90_Chr09	19027768	19028366		X
		RME1_A2	Rayong90_Chr09	23318812	23319433		X
		RME1_A2	TMEB204_H1_Chr09	12916397	12916972		X
		RME1_A2	TMEB204_H1_Chr09	18284914	18285523		X
		RME1_A2	TMEB204_H1_Chr09	16744994	16745568		X
		RME1_A2	YellowRoot_Chr09	19750026	19750647		X
		RME1_A2	YellowRoot_Chr09	30300293	30300842		X
		RME1_A2	Glaziovii_Chr10	35654829	35655393		X
		RME1_A2	Hanatee_Chr10	21121170	21121734		X
		RME1_A2	Hanatee_Chr10	2918925	2919480		X
		RME1_A2	HighLandRough_Chr10	20341219	20341783		X
		RME1_A2	HighLandRough_Chr10	2943858	2944413		X
		RME1_A2	Kasetsart50_Chr10	17233784	17234441		X
		RME1_A2	Rayong72_Chr10	13927859	13928440		X
		RME1_A2	Rayong72_Chr10	2882499	2883054		X
		RME1_A2	Rayong9_Chr10	27403218	27403782		X
		RME1_A2	Rayong90_Chr10	25362204	25362768		X
		RME1_A2	SC205_Chr10	19945135	19945801		X
		RME1_A2	SC205_Chr10	26073120	26073771		X
		RME1_A2	TMEB204_H1_Chr10	28194880	28195444		X
		RME1_A2	TMEB204_H2_Chr10	2754176	2754731		X
		RME1_A2	WhiteRoot_Chr10	2955347	2955902		X
		RME1_A2	YellowRoot_Chr10	22609526	22610090		X
		RME1_A2	COL40_H1_Chr11	19981866	19982408		X
		RME1_A2	COL40_H1_Chr11	16526481	16527049		X
		RME1_A1	COL40_H2_Chr11	17559870	17560765		X
		RME1_A2	COL40_H2_Chr11	22877461	22878003		X
		RME1_A2	Hanatee_Chr11	11567295	11567917		X
		RME1_A2	Hanatee_Chr11	19793125	19793667		X
		RME1_A2	Hanatee_Chr11	16378844	16379412		X
		RME1_A2	HighLandRough_Chr11	12480958	12481580		X
		RME1_A2	HighLandRough_Chr11	20387054	20387596		X
		RME1_A2	HighLandRough_Chr11	17428672	17429240		X
		RME1_A2	HighLandSmooth_Chr11	13174595	13175184		X
		RME1_A2	HighLandSmooth_Chr11	22996938	22997540		X
		RME1_A2	Kasetsart50_Chr11	12740914	12741508		X
		RME1_A2	Kasetsart50_Chr11	23307894	23308496		X
		RME1_A2	Rayong72_Chr11	22111071	22111673		X
		RME1_A2	Rayong9_Chr11	16858522	16859090		X
		RME1_A2	Rayong90_Chr11	722743	723342		X
		RME1_A2	Rayong90_Chr11	11712508	11713097		X
		RME1_A2	Rayong90_Chr11	21773755	21774424		X
		RME1_A2	Rayong90_Chr11	17515354	17515922		X
		RME1_A2	SC205_Chr11	16995536	16996106		X
		RME1_A2	SC205_Chr11	753428	754028		X
		RME1_A2	TMEB204_H1_Chr11	17245216	17245784		X
		RME1_A2	TMEB204_H1_Chr11	21024188	21024788		X
		RME1_A2	TMEB204_H2_Chr11	19996402	19996944		X
		RME1_A2	TMEB204_H2_Chr11	16540000	16540568		X
		RME1_A2	WhiteRoot_Chr11	7963827	7964449		X
		RME1_A2	WhiteRoot_Chr11	16011737	16012282		X
		RME1_A2	WhiteRoot_Chr11	12941999	12942567		X
		RME1_A2	YellowRoot_Chr11	11784131	11784753		X
		RME1_A2	YellowRoot_Chr11	20088457	20088999		X
		RME1_A2	YellowRoot_Chr11	16622057	16622625		X
		NS158	AM560V8_Chr12	8539923	8540195	X	X
		NS169	AM560V8_Chr12	8539736	8540786	X	X
		NS198	AM560V8_Chr12	1570230	1570621	X	X
		SSRY28	AM560V8_Chr12	8125493	8125860	X	X
		NS158	COL40_H1_Chr12	8977481	8977757	X	X
		NS169	COL40_H1_Chr12	8977294	8978348	X	X
		NS198	COL40_H1_Chr12	1674151	1674540	X	X
		RME1_A2	COL40_H1_Chr12	20641402	20642003		X
		RME1_A2	COL40_H1_Chr12	37769890	37770512		X
		RME1_A2	COL40_H1_Chr12	26858368	26858964		X
		SSRY28	COL40_H1_Chr12	8574244	8574603	X	X
		NS158	COL40_H2_Chr12	8870897	8871163	X	X
		NS169	COL40_H2_Chr12	8870710	8871754	X	X
		NS198	COL40_H2_Chr12	1740473	1740866	X	X
		RME1_A2	COL40_H2_Chr12	27619595	27620174		X
		SSRY28	COL40_H2_Chr12	8349337	8349718	X	X
		NS158	Glaziovii_Chr12	8576110	8576356	X	X
		NS169	Glaziovii_Chr12	8575923	8576947	X	X
		NS198	Glaziovii_Chr12	1630987	1631378	X	X
		RME1_A2	Glaziovii_Chr12	25657618	25658214		X
		SSRY28	Glaziovii_Chr12	8239534	8239899	X	X
		NS158	Hanatee_Chr12	9193256	9193519	X	X
		NS169	Hanatee_Chr12	9193069	9194110	X	X
		NS198	Hanatee_Chr12	1702705	1703098	X	X
		RME1_A2	Hanatee_Chr12	13953242	13953918		X
		SSRY28	Hanatee_Chr12	8734815	8735192	X	X
		NS158	HighLandRough_Chr12	9143484	9143746	X	X
		NS169	HighLandRough_Chr12	9143297	9144337	X	X
		NS198	HighLandRough_Chr12	1733649	1734042	X	X
		RME1_A1	HighLandRough_Chr12	10277713	10278651	X	X
		SSRY28	HighLandRough_Chr12	8694613	8694991	X	X
		NS158	HighLandSmooth_Chr12	8945147	8945397	X	X
		NS169	HighLandSmooth_Chr12	8944960	8945988	X	X
		NS198	HighLandSmooth_Chr12	1587042	1587435	X	X
		RME1_A1	HighLandSmooth_Chr12	11688701	11689639	X	X
		SSRY28	HighLandSmooth_Chr12	8321870	8322251		X
		NS158	Kasetsart50_Chr12	8885891	8886163	X	X
		NS169	Kasetsart50_Chr12	8885704	8886754	X	X
		NS198	Kasetsart50_Chr12	1781168	1781565	X	X
		SSRY28	Kasetsart50_Chr12	8416924	8417287	X	X
		NS158	Rayong72_Chr12	9389659	9389925	X	X
		NS169	Rayong72_Chr12	9389472	9390516	X	X
		NS198	Rayong72_Chr12	1870395	1870786	X	X
		RME1_A2	Rayong72_Chr12	23203910	23204489		X
		RME1_A2	Rayong72_Chr12	18684333	18684932		X
		SSRY28	Rayong72_Chr12	8930043	8930422	X	X
		NS158	Rayong9_Chr12	8933189	8933462	X	X
		NS169	Rayong9_Chr12	8933002	8934053	X	X
		NS198	Rayong9_Chr12	1796042	1796431	X	X
		SSRY28	Rayong9_Chr12	8533011	8533388	X	X
		NS158	Rayong90_Chr12	8958310	8958585	X	X
		NS169	Rayong90_Chr12	8958123	8959176	X	X
		NS198	Rayong90_Chr12	1758277	1758668	X	X
		RME1_A2	Rayong90_Chr12	17258106	17258702		X
		SSRY28	Rayong90_Chr12	8543947	8544310	X	X
		NS158	SC205_Chr12	8480796	8481046	X	X
		NS169	SC205_Chr12	8480609	8481637	X	X
		NS198	SC205_Chr12	1560844	1561237	X	X
		RME1_A2	SC205_Chr12	28146747	28147325		X
		RME1_A2	SC205_Chr12	17377961	17378527		X
		SSRY28	SC205_Chr12	7978488	7978868		X
		NS158	TMEB117_H1_Chr12	9038432	9038682	X	X
		NS169	TMEB117_H1_Chr12	9038245	9039273	X	X
		NS198	TMEB117_H1_Chr12	1718215	1718602	X	X
		RME1_A2	TMEB117_H1_Chr12	28645437	28646016		X
		RME1_A2	TMEB117_H1_Chr12	19967928	19968528		X
		RME1_A2	TMEB117_H1_Chr12	26163567	26164163		X
		SSRY28	TMEB117_H1_Chr12	8659166	8659533		X
		NS158	TMEB117_H2_Chr12	8577233	8577499	X	X
		NS169	TMEB117_H2_Chr12	8577046	8578090	X	X
		NS198	TMEB117_H2_Chr12	1707967	1708360	X	X
		RME1_A2	TMEB117_H2_Chr12	26949632	26950211		X
		RME1_A2	TMEB117_H2_Chr12	18881465	18882063		X
		SSRY28	TMEB117_H2_Chr12	8139797	8140172	X	X
		NS158	TMEB204_H1_Chr12	8688967	8689229	X	X
		NS169	TMEB204_H1_Chr12	8688780	8689820	X	X
		NS198	TMEB204_H1_Chr12	1566984	1567381	X	X
		RME1_A1	TMEB204_H1_Chr12	11370132	11371071	X	X
		RME1_A2	TMEB204_H1_Chr12	26000153	26000749		X
		SSRY28	TMEB204_H1_Chr12	8252217	8252598	X	X
		NS158	TMEB204_H2_Chr12	8713579	8713825	X	X
		NS169	TMEB204_H2_Chr12	8713392	8714416	X	X
		NS198	TMEB204_H2_Chr12	1755952	1756349	X	X
		RME1_A2	TMEB204_H2_Chr12	36430080	36430702		X
		RME1_A2	TMEB204_H2_Chr12	26183076	26183672		X
		SSRY28	TMEB204_H2_Chr12	8376753	8377118	X	X
		NS158	WhiteRoot_Chr12	8935463	8935701		X
		NS169	WhiteRoot_Chr12	8935279	8936313	X	X
		NS169	WhiteRoot_Chr12	8950345	8951377		X
		NS198	WhiteRoot_Chr12	1728717	1729108	X	X
		RME1_A1	WhiteRoot_Chr12	11805581	11806520	X	X
		SSRY28	WhiteRoot_Chr12	8493570	8493947	X	X
		NS158	YellowRoot_Chr12	9047867	9048130	X	X
		NS169	YellowRoot_Chr12	9047680	9048721	X	X
		NS198	YellowRoot_Chr12	1774987	1775386	X	X
		SSRY28	YellowRoot_Chr12	8708134	8708499	X	X
		RME1_A2	COL40_H1_Chr13	309755	310337		X
		RME1_A2	COL40_H1_Chr13	29330967	29331605		X
		RME1_A2	COL40_H1_Chr13	33418001	33418586		X
		RME1_A2	COL40_H2_Chr13	32257953	32258538		X
		RME1_A2	HighLandSmooth_Chr13	18910327	18910966		X
		RME1_A2	Rayong90_Chr13	28591626	28592263		X
		RME1_A2	Rayong90_Chr13	20531470	20532138		X
		RME1_A2	SC205_Chr13	33423619	33424261		X
		RME1_A2	SC205_Chr13	27846486	27847124		X
		RME1_A2	SC205_Chr13	19136149	19136815		X
		RME1_A2	SC205_Chr13	29233057	29233663		X
		RME1_A2	TMEB204_H1_Chr13	29574740	29575378		X
		RME1_A2	TMEB204_H2_Chr13	32342406	32342991		X
		RME1_A2	YellowRoot_Chr13	24632421	24633057		X
		RME1_A2	SC205_Chr14	22293714	22294277		X
		RME1_A2	SC205_Chr14	27846486	27847124		X
		RME1_A2	SC205_Chr14	19136149	19136815		X
		RME1_A2	SC205_Chr14	29233057	29233663		X
		RME1_A2	COL40_H1_Chr15	1232512	1233179		X
		RME1_A2	COL40_H1_Chr15	29096880	29097531		X
		RME1_A2	COL40_H1_Chr15	16775246	16775882		X
		RME1_A2	COL40_H2_Chr15	27765654	27766305		X
		RME1_A2	Glaziovii_Chr15	27367930	27368580		X
		RME1_A2	Glaziovii_Chr15	17286118	17286754		X
		RME1_A2	Hanatee_Chr15	21160636	21161286		X
		RME1_A2	Hanatee_Chr15	16756377	16757013		X
		RME1_A2	HighLandRough_Chr15	36465979	36466628		X
		RME1_A2	HighLandRough_Chr15	16732267	16732903		X
		RME1_A2	HighLandSmooth_Chr15	1215391	1216056		X
		RME1_A2	HighLandSmooth_Chr15	20070026	20070676		X
		RME1_A2	Kasetsart50_Chr15	1160269	1160934		X
		RME1_A2	Rayong72_Chr15	1195514	1196179		X
		RME1_A2	Rayong72_Chr15	20898822	20899471		X
		RME1_A2	Rayong72_Chr15	17069756	17070392		X
		RME1_A2	Rayong9_Chr15	1202334	1202999		X
		RME1_A2	Rayong9_Chr15	20704253	20704903		X
		RME1_A2	Rayong9_Chr15	16420180	16420815		X
		RME1_A2	Rayong90_Chr15	1147294	1147959		X
		RME1_A2	SC205_Chr15	26073120	26073771		X
		RME1_A2	TMEB204_H1_Chr15	28500734	28501385		X
		RME1_A2	TMEB204_H1_Chr15	17815767	17816403		X
		RME1_A2	TMEB204_H2_Chr15	27266798	27267449		X
		RME1_A2	WhiteRoot_Chr15	22275178	22275827		X
		RME1_A2	YellowRoot_Chr15	17371176	17371811		X
		RME1_A2	COL40_H1_Chr16	30970310	30970952		X
		RME1_A2	COL40_H1_Chr16	16692435	16693008		X
		RME1_A2	COL40_H1_Chr16	20202690	20203317		X
		RME1_A1	COL40_H2_Chr16	11661259	11662220		X
		RME1_A2	COL40_H2_Chr16	14367240	14367813		X
		RME1_A1	Glaziovii_Chr16	6566313	6567241		X
		RME1_A1	Kasetsart50_Chr16	7132574	7133502		X
		RME1_A2	Rayong72_Chr16	29963289	29963930		X
		RME1_A1	Rayong9_Chr16	6595500	6596428		X
		RME1_A2	SC205_Chr16	33423619	33424261		X
		RME1_A1	TMEB204_H1_Chr16	11653189	11654150		X
		RME1_A1	TMEB204_H1_Chr16	6309935	6310864		X
		RME1_A1	TMEB204_H2_Chr16	11876312	11877273		X
		RME1_A1	TMEB204_H2_Chr16	6755448	6756377		X
		RME1_A1	YellowRoot_Chr16	6492131	6493059		X
		RME1_A2	COL40_H1_Chr17	33102659	33103295		X
		RME1_A2	COL40_H1_Chr17	22010443	22011045		X
		RME1_A2	COL40_H1_Chr17	31201874	31202443		X
		RME1_A2	COL40_H2_Chr17	31185696	31186265		X
		RME1_A2	Glaziovii_Chr17	19298220	19298822		X
		RME1_A2	Glaziovii_Chr17	10663984	10664589		X
		RME1_A2	Hanatee_Chr17	23017267	23017903		X
		RME1_A2	Hanatee_Chr17	21221587	21222156		X
		RME1_A1	HighLandSmooth_Chr17	9171292	9172217		X
		RME1_A2	HighLandSmooth_Chr17	22472189	22472825		X
		RME1_A2	Kasetsart50_Chr17	11170661	11171263		X
		RME1_A1	Rayong72_Chr17	12055064	12055988		X
		RME1_A2	Rayong72_Chr17	23084400	23084969		X
		RME1_A1	Rayong90_Chr17	17974024	17974949		X
		RME1_A2	Rayong90_Chr17	8393688	8394293		X
		RME1_A2	SC205_Chr17	7405623	7406236		X
		RME1_A2	SC205_Chr17	16806403	16807051		X
		RME1_A2	SC205_Chr17	19739407	19740018		X
		RME1_A2	SC205_Chr17	29178226	29178862		X
		RME1_A2	SC205_Chr17	27614447	27615016		X
		RME1_A1	TMEB204_H1_Chr17	19647794	19648739		X
		RME1_A2	TMEB204_H1_Chr17	31326548	31327117		X
		RME1_A1	TMEB204_H2_Chr17	16298103	16299029		X
		RME1_A2	TMEB204_H2_Chr17	29266844	29267480		X
		RME1_A2	TMEB204_H2_Chr17	27467973	27468542		X
		RME1_A2	WhiteRoot_Chr17	22496544	22497113		X
		RME1_A2	YellowRoot_Chr17	5856148	5856752		X
		RME1_A2	COL40_H2_Chr18	18208898	18209534		X
		RME1_A2	COL40_H2_Chr18	15296448	15297022		X
		RME1_A2	COL40_H2_Chr18	16555821	16556405		X
		RME1_A2	Glaziovii_Chr18	25946357	25946953		X
		RME1_A1	Hanatee_Chr18	15424714	15425622		X
		RME1_A2	Hanatee_Chr18	16347407	16347981		X
		RME1_A2	Hanatee_Chr18	17511087	17511669		X
		RME1_A1	HighLandRough_Chr18	15704272	15705180		X
		RME1_A2	HighLandRough_Chr18	26486190	26486791		X
		RME1_A2	HighLandSmooth_Chr18	15537307	15537881		X
		RME1_A1	Kasetsart50_Chr18	15924186	15925095		X
		RME1_A2	Kasetsart50_Chr18	24136262	24136863		X
		RME1_A2	Kasetsart50_Chr18	16607349	16607927		X
		RME1_A2	Kasetsart50_Chr18	18120087	18120670		X
		RME1_A1	Rayong72_Chr18	15304915	15305823		X
		RME1_A2	Rayong72_Chr18	17248924	17249507		X
		RME1_A2	Rayong9_Chr18	3925973	3926621		X
		RME1_A2	Rayong9_Chr18	16189043	16189625		X
		RME1_A2	Rayong90_Chr18	5530579	5531226		X
		RME1_A2	Rayong90_Chr18	34039729	34040330		X
		RME1_A2	Rayong90_Chr18	20109976	20110612		X
		RME1_A2	Rayong90_Chr18	16899821	16900399		X
		RME1_A2	Rayong90_Chr18	18466574	18467156		X
		RME1_A2	Rayong90_Chr18	17300676	17301242		X
		RME1_A2	SC205_Chr18	29178226	29178862		X
		RME1_A2	SC205_Chr18	27614447	27615016		X
		RME1_A1	TMEB204_H1_Chr18	15198970	15199879		X
		RME1_A2	TMEB204_H1_Chr18	30183152	30183773		X
		RME1_A2	TMEB204_H1_Chr18	20517000	20517596		X
		RME1_A2	TMEB204_H1_Chr18	15874432	15875010		X
		RME1_A2	TMEB204_H1_Chr18	16275412	16275980		X
		RME1_A2	TMEB204_H2_Chr18	32587371	32587973		X
		RME1_A2	TMEB204_H2_Chr18	20090622	20091218		X
		RME1_A2	TMEB204_H2_Chr18	15428374	15428948		X
		RME1_A2	TMEB204_H2_Chr18	16740055	16740639		X
		RME1_A1	WhiteRoot_Chr18	15520879	15521787		X
		RME1_A2	WhiteRoot_Chr18	27206767	27207368		X
		RME1_A2	WhiteRoot_Chr18	16512886	16513460		X
		RME1_A2	YellowRoot_Chr18	29100812	29101413		X
		RME1_A2	YellowRoot_Chr18	15915537	15916111		X
		RME1_A2	YellowRoot_Chr18	17151451	17152033		X
		RME1_A2	YellowRoot_Chr18	17128253	17128836		X
		RME1_A1	TMS60444_New_Cn11300	37792	38738		X
		RME1_A1	TME3_New_Cn3294	18189	19112		X
		NS158	Ku50_MK028904	4760	5008		X
		NS198	Ku50_MK051441	7972	8359		X
		SSRY28	Ku50_MK056792	3770	4131		X
		NS158	Ku50_NA	3167	3415		X
		NS198	Ku50_NA	3309	3696		X
		SSRY28	Flabellifolia_MW007925	10161	10512		X
		RME1_A2	Flabellifolia_MW011214	70	651		X
		NS198	Flabellifolia_MW034183	3877	4267		X
		SSRY28	Flabellifolia_MW038516	4219	4570		X
		SSRY40	Flabellifolia_MW048396	5456	5877		X
		NS198	Flabellifolia_MW051183	1418	1808		X
		NS158	Flabellifolia_MW051289	4852	5090		X
		NS169	Flabellifolia_MW051289	4238	5274		X
		NS198	Flabellifolia_MWCTG087136.1	1217	1607		X
		NS158	Flabellifolia_MWCTG087136.1	4852	5090		X
		NS169	Flabellifolia_MWCTG087136.1	4238	5274		X
		RME1_A1	TME3_Old_S11ss172	37768790	37769750		X
		RME1_A2	TMS60444_Old_S1262ss3358	20042009	20042573		X
		RME1_A2	TME3_Old_S12ss187	34936039	34936641		X
		RME1_A2	TME3_Old_S12ss187	19311258	19311827		X
		NS158	TMS60444_Old_S1478ss3800	13394641	13394904	X	X
		NS158	TMS60444_Old_S1478ss3800	12737508	12737744		X
		NS169	TMS60444_Old_S1478ss3800	12737608	12737918	X
		NS169	TMS60444_Old_S1478ss3800	13394454	13395495	X	X
		NS198	TMS60444_Old_S1478ss3800	2212317	2212710	X	X
		NS198	TMS60444_Old_S1478ss3800	1108246	1108643	X	X
		RME1_A2	TMS60444_Old_S1478ss3800	53001657	53002236		X
		RME1_A2	TMS60444_Old_S1478ss3800	30532032	30532632		X
		RME1_A2	TMS60444_Old_S1478ss3800	29906294	29906860		X
		RME1_A2	TMS60444_Old_S1478ss3800	40518240	40518836		X
		SSRY28	TMS60444_Old_S1478ss3800	11690491	11690863		X
		RME1_A2	TME3_Old_S14ss233	29729747	29730289		X
		RME1_A2	TME3_Old_S14ss233	24484772	24485340		X
		RME1_A2	TME3_Old_S14ss233	30827850	30828450		X
		RME1_A2	TMS60444_Old_S16ss537	77739477	77740069		X
		RME1_A2	TMS60444_Old_S16ss537	85081232	85081797		X
		RME1_A2	TMS60444_Old_S16ss537	82561000	82561647		X
		SSRY40	TMS60444_Old_S16ss537	57491204	57491610		X
		RME1_A2	TME3_Old_S1ss51	19766735	19767309		X
		RME1_A2	TME3_Old_S1ss51	6315552	6316241		X
		RME1_A2	TMS60444_Old_S2579ss6346	4997707	4998241		X
		RME1_A2	TMS60444_Old_S2649ss6505	13285544	13286183		X
		RME1_A2	TMS60444_Old_S2649ss6505	81900	82608		X
		SSRY28	TME3_Old_S277ss1113	21635	22016		X
		RME1_A2	TMS60444_Old_S2922ss7074	46564971	46565571		X
		RME1_A2	TME3_Old_S3024ss6918	8801069	8801708		X
		RME1_A2	TMS60444_Old_S3074ss7427	5541828	5542414		X
		RME1_A2	TMS60444_Old_S3074ss7427	25104264	25104942		X
		RME1_A1	TMS60444_Old_S3237ss7788	33820378	33821286		X
		RME1_A2	TMS60444_Old_S3237ss7788	14140006	14140627		X
		RME1_A2	TMS60444_Old_S3237ss7788	19739683	19740279		X
		RME1_A2	TMS60444_Old_S3237ss7788	36338941	36339515		X
		RME1_A2	TMS60444_Old_S3237ss7788	34493495	34494073		X
		RME1_A2	TMS60444_Old_S3237ss7788	35242885	35243452		X
		RME1_A2	TME3_Old_S3392ss7704	33610007	33610603		X
		RME1_A2	TME3_Old_S3392ss7704	25990143	25990727		X
		RME1_A2	TME3_Old_S3392ss7704	27291999	27292577		X
		RME1_A2	TME3_Old_S3392ss7704	26833159	26833726		X
		RME1_A1	TMS60444_Old_S3531ss8455	35220714	35221594		X
		RME1_A2	TMS60444_Old_S3531ss8455	41986569	41987191		X
		RME1_A2	TME3_Old_S3766ss8561	35414535	35415159		X
		RME1_A2	TME3_Old_S3766ss8561	18717601	18718212		X
		RME1_A2	TMS60444_Old_S3793ss9016	16994588	16995226		X
		RME1_A2	TMS60444_Old_S3793ss9016	34689313	34689979		X
		RME1_A2	TMS60444_Old_S3793ss9016	10322982	10323567		X
		RME1_A2	TMS60444_Old_S3813ss9066	35097720	35098368		X
		SSRY28	TMS60444_Old_S3899ss9253	29884	30248		X
		RME1_A2	TMS60444_Old_S3938ss9338	31599327	31599929		X
		RME1_A2	TMS60444_Old_S3938ss9338	46253414	46254019		X
		RME1_A2	TMS60444_Old_S3938ss9338	12355663	12356232		X
		RME1_A2	TMS60444_Old_S3938ss9338	60336199	60336769		X
		SSRY28	TME3_Old_S3957ss8964	2367	2748		X
		RME1_A2	TME3_Old_S3ss56	43455093	43455657		X
		SSRY40	TME3_Old_S4710ss10556	63414085	63414506	X	X
		RME1_A2	TME3_Old_S4945ss11020	28755581	28756159		X
		RME1_A2	TME3_Old_S4945ss11020	28921897	28922535		X
		RME1_A2	TMS60444_Old_S4ss126	11659284	11659935		X
		RME1_A2	TMS60444_Old_S4ss126	27322124	27322760		X
		RME1_A2	TMS60444_Old_S4ss126	27065146	27065781		X
		RME1_A2	TME3_Old_S5261ss11715	20275	20877		X
		RME1_A2	TME3_Old_S5405ss12044	25057796	25058432		X
		NS158	TME3_Old_S7ss130	50757686	50757945	X	X
		NS158	TME3_Old_S7ss130	49238860	49239106	X	X
		NS158	TME3_Old_S7ss130	50271975	50272232		X
		NS169	TME3_Old_S7ss130	50757095	50758132	X	X
		NS169	TME3_Old_S7ss130	50271788	50272823	X	X
		NS169	TME3_Old_S7ss130	49238673	49239697	X	X
		NS198	TME3_Old_S7ss130	62761729	62762116	X	X
		RME1_A1	TME3_Old_S7ss130	44638670	44639609	X	X
		RME1_A2	TME3_Old_S7ss130	9620376	9620971		X
		SSRY28	TME3_Old_S7ss130	49098422	49098787	X	X
		RME1_A1	TMS60444_Old_S7ss175	44788421	44789350		X
		SSRY40	TMS60444_Old_S842ss2460	35334	35773		X
		RME1_A2	TMS60444_Old_S8ss202	9309815	9310477		X
		RME1_A2	TMS60444_Old_S8ss202	16741193	16741820		X
		RME1_A2	TMEB117_H2_Sq002	21629325	21629947		X
		RME1_A2	TMEB117_H1_Sq003	15559340	15559945		X
		RME1_A2	TMEB117_H1_Sq003	24446016	24446640		X
		RME1_A1	TMEB117_H2_Sq003	25902060	25902890		X
		RME1_A2	TMEB117_H2_Sq003	17161388	17162036		X
		RME1_A2	TMEB117_H2_Sq003	20083140	20083751		X
		RME1_A2	TMEB117_H1_Sq004	32710440	32711079		X
		RME1_A2	TMEB117_H2_Sq004	21523016	21523724		X
		RME1_A2	TMEB117_H2_Sq005	12933136	12933727		X
		RME1_A2	TMEB117_H2_Sq005	16745527	16746092		X
		RME1_A2	TMEB117_H2_Sq005	14220996	14221643		X
		RME1_A2	TMEB117_H1_Sq006	9961282	9961920		X
		RME1_A2	TMEB117_H2_Sq006	2033286	2033869		X
		RME1_A2	TMEB117_H2_Sq006	10324865	10325503		X
		RME1_A2	TMEB117_H2_Sq006	9973293	9973920		X
		RME1_A2	TMEB117_H1_Sq008	10331499	10332188		X
		RME1_A2	TMEB117_H2_Sq008	29428878	29429474		X
		RME1_A2	TMEB117_H2_Sq008	17998434	17999042		X
		RME1_A2	TMEB117_H2_Sq008	16457430	16458004		X
		RME1_A2	TMEB117_H2_Sq009	35988025	35988574		X
		RME1_A2	TMEB117_H1_Sq010	7013052	7013638		X
		RME1_A2	TMEB117_H1_Sq011	15656979	15657648		X
		RME1_A2	TMEB117_H2_Sq011	17715907	17716475		X
		RME1_A2	TMEB117_H2_Sq011	21499541	21500141		X
		RME1_A2	TMEB117_H1_Sq013	19236451	19237118		X
		RME1_A2	TMEB117_H2_Sq013	27460571	27461210		X
		RME1_A2	TMEB117_H2_Sq013	19561456	19562123		X
		RME1_A2	TMEB117_H1_Sq015	29017057	29017708		X
		RME1_A2	TMEB117_H1_Sq015	26390531	26391140		X
		RME1_A2	TMEB117_H1_Sq015	17162534	17163170		X
		RME1_A2	TMEB117_H2_Sq015	26192105	26192706		X
		RME1_A2	TMEB117_H2_Sq015	15644625	15645261		X
		RME1_A1	TMEB117_H2_Sq016	12092412	12093373		X
		RME1_A1	TMEB117_H2_Sq016	6920260	6921189		X
		RME1_A2	TMEB117_H2_Sq016	28943135	28943777		X
		RME1_A2	TMEB117_H1_Sq017	13506410	13507015		X
		RME1_A2	TMEB117_H1_Sq017	31339781	31340350		X
		RME1_A1	TMEB117_H2_Sq017	18917864	18918790		X
		RME1_A2	TMEB117_H1_Sq018	37306037	37306639		X
		RME1_A2	TMEB117_H1_Sq018	18897312	18897948		X
		RME1_A2	TMEB117_H1_Sq018	15666803	15667381		X
		RME1_A2	TMEB117_H1_Sq018	17234280	17234864		X
		RME1_A2	TMEB117_H1_Sq018	16077943	16078511		X
		RME1_A1	TMEB117_H2_Sq018	14455736	14456645		X
		RME1_A2	TMEB117_H2_Sq018	33119670	33120272		X
		RME1_A2	TMEB117_H2_Sq018	19886579	19887175		X
		RME1_A2	TMEB117_H2_Sq018	15224350	15224924		X
		RME1_A2	TMEB117_H2_Sq018	16536025	16536609		X
		RME1_A2	TMS60444_New_SS100001	44725683	44726231		X
		SSRY40	TMS60444_New_SS100001	44171644	44172044		X
		RME1_A2	TME3_New_SS100002	26393826	26394463		X
		RME1_A2	TMS60444_New_SS100002	23215518	23216136		X
		NS158	TME3_New_SS100004	9754408	9754654	X	X
		NS169	TME3_New_SS100004	9754221	9755246	X	X
		RME1_A2	TME3_New_SS100004	29695028	29695607		X
		RME1_A2	TME3_New_SS100004	20947401	20947978		X
		RME1_A2	TME3_New_SS100004	39148802	39149427		X
		SSRY28	TME3_New_SS100004	9383014	9383377		X
		RME1_A1	TME3_New_SS100006	15377987	15378882		X
		RME1_A2	TME3_New_SS100006	26923836	26924460		X
		RME1_A2	TME3_New_SS100006	5298324	5298976		X
		RME1_A2	TMS60444_New_SS100006	24537233	24537784		X
		RME1_A2	TME3_New_SS100007	35814586	35815179		X
		RME1_A2	TMS60444_New_SS100007	16103442	16104053		X
		RME1_A2	TME3_New_SS100010	6300125	6300783		X
		RME1_A2	TME3_New_SS100012	25774725	25775318		X
		RME1_A2	TME3_New_SS100012	11627988	11628522		X
		RME1_A2	TME3_New_SS100013	32020378	32020996		X
		RME1_A2	TMS60444_New_SS100014	10458121	10458729		X
		RME1_A1	TMS60444_New_SS100015	19872620	19873547		X
		RME1_A1	TME3_New_SS100016	21568838	21569741		X
		RME1_A2	TME3_New_SS100016	19297123	19297674		X
		RME1_A1	TMS60444_New_SS100018	15203691	15204612		X
		RME1_A2	TMS60444_New_SS100018	19346369	19346999		X
		RME1_A2	TMS60444_New_SS100018	16294558	16295136		X
		RME1_A2	TMS60444_New_SS100018	17597201	17597795		X
		RME1_A2	TMS60444_New_SS100022	10382279	10382885		X
		RME1_A1	TMS60444_New_SS100025	10608824	10609699		X
		RME1_A2	TMS60444_New_SS100028	4921745	4922407		X
		RME1_A2	TME3_New_SS100031	9620730	9621289		X
		NS158	TME3_New_SS100036	1778001	1778238		X
		NS158	TME3_New_SS100036	1764859	1765094		X
		NS169	TME3_New_SS100036	1777378	1778427	X	X
		NS169	TME3_New_SS100036	1764247	1765275		X
		NS198	TME3_New_SS100036	9153771	9154158	X	X
		SSRY28	TME3_New_SS100036	2217646	2218009	X	X
		RME1_A2	TMS60444_New_SS100039	5944700	5945357		X
		RME1_A2	TME3_New_SS100043	121025	121666		X
		RME1_A2	TME3_New_SS100044	7586860	7587428		X
		NS158	TMS60444_New_SS100051	4913332	4913579		X
		NS169	TMS60444_New_SS100051	4913142	4914176		X
		SSRY28	TMS60444_New_SS100051	4471750	4472135		X
		SSRY40	TME3_New_SS100063	2106381	2106775		X
		RME1_A2	TMS60444_New_SS100068	67097	67702		X
		NS198	TMS60444_New_SS100255	21405	21804		X
		NS158	TMS60444_New_SS4632	9116107	9116342		X
		NS169	TMS60444_New_SS4632	9115921	9116959	X	X
		NS169	TMS60444_New_SS4632	9129046	9130084		X
		RME1_A1	TMS60444_New_SS4632	12032308	12033250	X	X
		RME1_A2	TMS60444_New_SS4632	20164939	20165549		X
		SSRY28	TMS60444_New_SS4632	8679740	8680099		X
		RME1_A2	TMS60444_New_SS8162	6290113	6290665		X

## Sheet: Table S6
		Table S6: Screening cassava germplasm for SSR/SCAR molecular markers associated with the CMD1, CMD2 and CMD3 loci
		Germplasm	SACMV Response Phenotype	SSRY40	SSRY28	NS158	NS169	RME1	NS198
		P10/3	Susceptible	X	X	X	X
		P1/19	Susceptible		X	X	X		X
		P10/4	Susceptible	X	X	X	X
		T200	Susceptible	X	X	X	X		X
		Ukulinga 2	Susceptible		X	X	X	X	X
		Ukulinga 9	Susceptible	X	X		X	X	X
		cv.60444	Susceptible		X	X	X	X	X
		SM1432.4	Susceptible		X	X	X	X	X
		TME1	Tolerant		X	X	X		X
		TME3	Tolerant	X	X	X	X	X	X
		TME117	Tolerant	X	X	X	X	X	X
		TMS98/0002	Tolerant		X	X	X	X	X
		AR40.17	Tolerant	X	X	X	X	X	X
		TMEB419	Tolerant		X		X		X
		TMS01/1068	Tolerant		X	X	X	X	X
		Sirila 21	Resistant		X	X	X	X
		Ukulinga 8	Resistant		X	X	X	X	X
		SM707-14	Resistant		X	X	X	X
		TMS96/1632	Resistant		X	X	X	X	X
		AR17.3	Resistant		X	X	X	X	X
		TMS98/0505	Resistant	X		X	X	X	X
		CR43.3	Resistant	X		X	X	X	X
		Manihot glaziovii	Tolerant	X	X	X	X		X

## Sheet: Table S7
		Table S7: Cross-consolidation of in silico and in vitro screening results for SSR/SCAR molecular markers associated with the CMD1, CMD2 and CMD3 loci
		Germplasm	Marker	Location	Size	Electrophoresis Gel Band ID	100% Primer Sequence Identity	>90% Primer Sequence Identity	>90% consensus Sequence Homology
		M. Glaziovii	RME1	Chr01	978	I		X
		M. Glaziovii	RME1	Chr01	709			X
		M. Glaziovii	RME1_A2	Chr01a	627				X		Table Legend
		M. Glaziovii	RME1_A2	Chr01b	574				X		Band IDs refer to those marked in Supplementary Figure S2.
		M. Glaziovii	RME1_A1	Chr02	910	IIIa			X
		M. Glaziovii	RME1_A1	Chr02	826	IIIb			X
		M. Glaziovii	RME1	Chr02	692			X
		M. Glaziovii	RME1	Chr03	564			X
		M. Glaziovii	NS158	Chr03	129			X
		M. Glaziovii	RME1_A2	Chr03a	648				X
		M. Glaziovii	RME1_A2	Chr03b	611				X
		M. Glaziovii	RME1	Chr04	925			X
		M. Glaziovii	RME1	Chr04	918			X
		M. Glaziovii	RME1	Chr04	378			X
		M. Glaziovii	SSRY28	Chr04	92	IV
		M. Glaziovii	RME1	Chr05	755			X
		M. Glaziovii	RME1_A2	Chr05a	591				X
		M. Glaziovii	RME1_A2	Chr05b	534				X
		M. Glaziovii	RME1_A2	Chr06a	637				X
		M. Glaziovii	RME1_A2	Chr06b	534				X
		M. Glaziovii	RME1	Chr07	391			X
		M. Glaziovii	NS158	Chr07	106	V		X
		M. Glaziovii	RME1	Chr08	649			X
		M. Glaziovii	RME1	Chr08	330			X
		M. Glaziovii	RME1	Chr08	297			X
		M. Glaziovii	RME1	Chr08	292			X
		M. Glaziovii	RME1	Chr08	284	VII		X
		M. Glaziovii	RME1	Chr08	284			X
		M. Glaziovii	RME1_A2	Chr08a	616				X
		M. Glaziovii	RME1_A2	Chr08b	608				X
		M. Glaziovii	RME1	Chr09	766			X
		M. Glaziovii	SSRY40	Chr1	233	Ib			X
		M. Glaziovii	RME1_A2	Chr10	564				X
		M. Glaziovii	RME1_A2	Chr12	596				X
		M. Glaziovii	NS169	Chr12	301	I	X	X	X
		M. Glaziovii	NS198	Chr12	192	I	X	X	X
		M. Glaziovii	SSRY28	Chr12	166	II	X	X	X
		M. Glaziovii	NS158	Chr12	147		X	X	X
		M. Glaziovii	NS158	Chr12	105	V		X
		M. Glaziovii	SSRY28	Chr15	188	I		X
		M. Glaziovii	RME1_A2	Chr15a	636				X
		M. Glaziovii	RME1_A2	Chr15b	650				X
		M. Glaziovii	RME1	Chr16	963			X
		M. Glaziovii	RME1_A1	Chr16	928	II			X
		M. Glaziovii	RME1	Chr16	601			X
		M. Glaziovii	RME1	Chr16	460			X
		M. Glaziovii	RME1	Chr16	305			X
		M. Glaziovii	RME1	Chr17	610			X
		M. Glaziovii	RME1	Chr17	317			X
		M. Glaziovii	RME1_A2	Chr17a	605				X
		M. Glaziovii	RME1_A2	Chr17b	602				X
		M. Glaziovii	RME1_A2	Chr18	596				X
		M. Glaziovii	RME1	Chr18	582			X
		TME3	SSRY40	Cn15797	120	IIb		X
		TME3	SSRY40	Cn179	133	IIa		X
		TME3	RME1_A1	Cn3294	923				X
		TME3	RME1_A1	S11ss172	960	I	X	X	X
		TME3	RME1	S11ss172	906			X
		TME3	RME1	S11ss172	747			X
		TME3	RME1	S11ss172	305			X
		TME3	RME1_A2	S12ss187	602				X
		TME3	RME1_A2	S12ss187	569				X
		TME3	RME1	S12ss187	268
		TME3	RME1	S14ss233	619
		TME3	RME1_A2	S14ss233	600				X
		TME3	RME1_A2	S14ss233	568				X
		TME3	RME1_A2	S14ss233	542				X
		TME3	SSRY28	S176ss892	320
		TME3	RME1_A2	S1ss51	689	IV			X
		TME3	RME1	S1ss51	649
		TME3	RME1_A2	S1ss51	574				X
		TME3	RME1	S1ss51	506			X
		TME3	SSRY28	S277ss1113	182				X
		TME3	RME1	S3024ss6918	927
		TME3	RME1_A2	S3024ss6918	639				X
		TME3	SSRY28	S3024ss6918	92			X
		TME3	SSRY28	S3024ss6918	91			X
		TME3	RME1	S3392ss7704	849			X
		TME3	RME1	S3392ss7704	795
		TME3	RME1_A2	S3392ss7704	596				X
		TME3	RME1	S3392ss7704	591
		TME3	RME1_A2	S3392ss7704	584				X
		TME3	RME1_A2	S3392ss7704	578				X
		TME3	RME1_A2	S3392ss7704	567				X
		TME3	RME1	S3766ss8561	949
		TME3	RME1_A2	S3766ss8561	624				X
		TME3	RME1_A2	S3766ss8561	611				X
		TME3	NS158	S3766ss8561	129			X
		TME3	SSRY28	S3957ss8964	182			X
		TME3	RME1_A2	S3ss56	564				X
		TME3	NS158	S3ss56	104	V		X
		TME3	NS158	S3ss56	104	V		X
		TME3	RME1	S4710ss10556	752
		TME3	RME1	S4710ss10556	611
		TME3	RME1	S4710ss10556	388
		TME3	SSRY40	S4710ss10556	231	Ib	X	X	X
		TME3	RME1_A2	S4945ss11020	638				X
		TME3	RME1_A2	S4945ss11020	578				X
		TME3	RME1	S4945ss11020	316
		TME3	SSRY40	S4945ss11020	104	III		X
		TME3	RME1_A2	S5261ss11715	602				X
		TME3	RME1_A2	S5405ss12044	636				X
		TME3	RME1_A1	S7ss130	939	II	X	X	X
		TME3	RME1_A2	S7ss130	595	V	X	X	X
		TME3	NS198	S7ss130	190	II	X	X	X
		TME3	SSRY28	S7ss130	166		X	X
		TME3	NS169	S7ss130a	301			X	X
		TME3	NS158	S7ss130a	147	III	X	X	X
		TME3	NS169	S7ss130b	313	II	X	X	X
		TME3	NS158	S7ss130b	160	II	X	X	X
		TME3	NS169	S7ss130c	314	II	X	X	X
		TME3	NS158	S7ss130c	160	II	X	X	X
		TME3	SSRY28	SS100004	363			X	X
		TME3	NS169	SS100004	316	II	X	X	X
		TME3	NS158	SS100004	147	III	X	X	X
		TME3	RME1	SS100007	485			X
		TME3	RME1	SS100007	310			X
		TME3	SSRY28	SS100007	92			X
		TME3	RME1	SS100009	615			X
		TME3	RME1	SS100021	610			X
		TME3	SSRY28	SS100023	92			X
		TME3	RME1	SS100025	665			X
		TME3	NS198	SS100036	189	II	X	X	X
		TME3	SSRY28	SS100036	164		X	X	X
		TME3	NS169	SS100036a	314	II	X	X	X
		TME3	NS158	SS100036a	136	IV		X	X
		TME3	NS169	SS100036b	315	II	X	X	X
		TME3	NS158	SS100036b	139	IV	X	X	X
		TME3	SSRY40	SS100063	224	Ia		X	X
		TME3	SSRY28	SS100063	164			X
		TME3	SSRY40	SS100063	135			X
		TME3	SSRY40	SS100063	134	Ia		X
		TMEB117	RME1	H1_Chr01	611			X
		TMEB117	SSRY40	H1_Chr01	136	Ib		X
		TMEB117	NS158	H1_Chr03	129
		TMEB117	RME1_A2	H1_Chr03a	605				X
		TMEB117	RME1_A2	H1_Chr03b	624				X
		TMEB117	RME1_A2	H1_Chr04	639				X
		TMEB117	RME1	H1_Chr04	416			X
		TMEB117	RME1	H1_Chr04	307			X
		TMEB117	SSRY28	H1_Chr04	92			X
		TMEB117	RME1	H1_Chr05	676			X
		TMEB117	RME1_A2	H1_Chr06	638				X
		TMEB117	RME1	H1_Chr06	285			X
		TMEB117	RME1	H1_Chr07	512			X
		TMEB117	RME1	H1_Chr07	387			X
		TMEB117	RME1_A2	H1_Chr08	689				X
		TMEB117	RME1	H1_Chr08	649			X
		TMEB117	RME1	H1_Chr08	620			X
		TMEB117	NS169	H1_Chr09	319	I	X	X	X
		TMEB117	RME1_A2	H1_Chr10	586				X
		TMEB117	RME1_A2	H1_Chr11	669				X
		TMEB117	NS169	H1_Chr12	318	I	X	X	X
		TMEB117	NS198	H1_Chr12	188	II	X	X	X
		TMEB117	SSRY28	H1_Chr12	168	I		X	X
		TMEB117	NS158	H1_Chr12	151	III	X	X	X
		TMEB117	RME1_A2	H1_Chr12a	600				X
		TMEB117	RME1_A2	H1_Chr12b	596				X
		TMEB117	RME1_A2	H1_Chr12c	579				X
		TMEB117	RME1_A2	H1_Chr13	667				X
		TMEB117	RME1	H1_Chr13	255			X
		TMEB117	RME1	H1_Chr14	681			X
		TMEB117	RME1	H1_Chr14	588			X
		TMEB117	RME1_A2	H1_Chr15a	636				X
		TMEB117	RME1_A2	H1_Chr15b	609				X
		TMEB117	RME1_A2	H1_Chr15c	651				X
		TMEB117	RME1	H1_Chr16	963			X
		TMEB117	RME1	H1_Chr16	755			X
		TMEB117	RME1	H1_Chr16	602			X
		TMEB117	RME1	H1_Chr16	460			X
		TMEB117	NS169	H1_Chr17	320	I	X	X	X
		TMEB117	RME1	H1_Chr17	268
		TMEB117	RME1_A2	H1_Chr17a	605				X
		TMEB117	RME1_A2	H1_Chr17b	569				X
		TMEB117	RME1	H1_Chr18	849			X
		TMEB117	RME1	H1_Chr18	795			X
		TMEB117	RME1	H1_Chr18	591			X
		TMEB117	RME1_A2	H1_Chr18a	578				X
		TMEB117	RME1_A2	H1_Chr18b	568				X
		TMEB117	RME1_A2	H1_Chr18c	584				X
		TMEB117	RME1_A2	H1_Chr18d	636				X
		TMEB117	RME1_A2	H1_Chr18e	602				X
		TMEB117	RME1	H2_Chr01	611			X
		TMEB117	SSRY40	H2_Chr01	137	Ia		X
		TMEB117	RME1_A2	H2_Chr02	622				X
		TMEB117	RME1	H2_Chr03	949
		TMEB117	RME1_A1	H2_Chr03	830				X
		TMEB117	RME1	H2_Chr03	568			X
		TMEB117	NS158	H2_Chr03	129
		TMEB117	RME1_A2	H2_Chr03a	648				X
		TMEB117	RME1_A2	H2_Chr03b	611				X
		TMEB117	RME1_A2	H2_Chr04	708				X
		TMEB117	SSRY28	H2_Chr04	92			X
		TMEB117	RME1	H2_Chr05	467
		TMEB117	RME1_A2	H2_Chr05a	591				X
		TMEB117	RME1_A2	H2_Chr05b	647				X
		TMEB117	RME1_A2	H2_Chr05c	565				X
		TMEB117	RME1	H2_Chr06	316
		TMEB117	RME1_A2	H2_Chr06a	583				X
		TMEB117	RME1_A2	H2_Chr06b	627				X
		TMEB117	RME1_A2	H2_Chr06c	638				X
		TMEB117	RME1	H2_Chr07	558
		TMEB117	RME1	H2_Chr08	649
		TMEB117	RME1	H2_Chr08	267
		TMEB117	RME1_A2	H2_Chr08a	574				X
		TMEB117	RME1_A2	H2_Chr08b	608				X
		TMEB117	RME1_A2	H2_Chr08c	596				X
		TMEB117	RME1_A2	H2_Chr09	549				X
		TMEB117	RME1	H2_Chr10	714
		TMEB117	RME1	H2_Chr10	251
		TMEB117	NS158	H2_Chr10	104	V		X
		TMEB117	RME1	H2_Chr11	619
		TMEB117	RME1_A2	H2_Chr11a	568				X
		TMEB117	RME1_A2	H2_Chr11b	600				X
		TMEB117	NS169	H2_Chr12	317	I	X	X	X
		TMEB117	NS198	H2_Chr12	194	I	X	X	X
		TMEB117	SSRY28	H2_Chr12	176	II	X	X	X
		TMEB117	NS158	H2_Chr12	167	II	X	X	X
		TMEB117	RME1_A2	H2_Chr12a	598				X
		TMEB117	RME1_A2	H2_Chr12b	579				X
		TMEB117	RME1	H2_Chr13	439
		TMEB117	RME1_A2	H2_Chr13a	667				X
		TMEB117	RME1_A2	H2_Chr13b	639	V	X	X	X
		TMEB117	RME1_A2	H2_Chr15a	636				X
		TMEB117	RME1_A2	H2_Chr15b	601				X
		TMEB117	RME1	H2_Chr16	747
		TMEB117	RME1_A2	H2_Chr16	642				X
		TMEB117	RME1	H2_Chr16	305
		TMEB117	RME1_A1	H2_Chr16a	929				X
		TMEB117	RME1_A1	H2_Chr16b	961				X
		TMEB117	RME1	H2_Chr17	945
		TMEB117	RME1_A1	H2_Chr17	926				X
		TMEB117	RME1_A1	H2_Chr18	909				X
		TMEB117	RME1	H2_Chr18	795
		TMEB117	RME1	H2_Chr18	591
		TMEB117	RME1_A2	H2_Chr18a	574				X
		TMEB117	RME1_A2	H2_Chr18b	584				X
		TMEB117	RME1_A2	H2_Chr18c	596				X
		TMEB117	RME1_A2	H2_Chr18d	602				X
		TMEB117_H1	SSRY40	Chr06	109	III		X
		TMEB117_H2	SSRY40	Chr06	110	III		X
		TMS60444	RME1	Chr07	252			X
		TMS60444	RME1	Chr08	614			X
		TMS60444	RME1	Chr11	980			X
		TMS60444	RME1	Chr11	931			X
		TMS60444	RME1	Chr15	665			X
		TMS60444	RME1	Chr16	600			X
		TMS60444	RME1_A1	Cn11300	946	II			X
		TMS60444	RME1_A2	S1262ss3358	564				X
		TMS60444	RME1	S1262ss3358	251
		TMS60444	NS158	S1262ss3358	104	V		X
		TMS60444	NS169	S1478ss3800	326	I	X	X	X
		TMS60444	NS169	S1478ss3800	325	I		X	X
		TMS60444	SSRY28	S1478ss3800	139	III		X	X
		TMS60444	RME1_A2	S1478ss3800a	566				X
		TMS60444	NS198	S1478ss3800a	198	Ia	X	X	X
		TMS60444	NS158	S1478ss3800a	139	IV	X	X	X
		TMS60444	RME1_A2	S1478ss3800b	600				X
		TMS60444	NS158	S1478ss3800b	194	I	X	X	X
		TMS60444	NS198	S1478ss3800b	194	Ib	X	X	X
		TMS60444	RME1_A2	S1478ss3800c	596				X
		TMS60444	RME1_A2	S1478ss3800d	579				X
		TMS60444	RME1	S16ss537	743			X
		TMS60444	SSRY40	S16ss537	232	Ib		X	X
		TMS60444	RME1_A2	S16ss537a	592				X
		TMS60444	RME1_A2	S16ss537b	647				X
		TMS60444	RME1_A2	S16ss537c	565				X
		TMS60444	RME1_A2	S2579ss6346	534				X
		TMS60444	RME1_A2	S2649ss6505a	708				X
		TMS60444	RME1_A2	S2649ss6505b	639				X
		TMS60444	RME1	S2922ss7074	618
		TMS60444	RME1_A2	S2922ss7074	600				X
		TMS60444	RME1_A2	S3074ss7427a	586				X
		TMS60444	RME1_A2	S3074ss7427b	678				X
		TMS60444	RME1_A1	S3237ss7788	908				X
		TMS60444	RME1	S3237ss7788	849			X
		TMS60444	RME1	S3237ss7788	795			X
		TMS60444	RME1	S3237ss7788	591			X
		TMS60444	RME1_A2	S3237ss7788a	621				X
		TMS60444	RME1_A2	S3237ss7788b	596				X
		TMS60444	RME1_A2	S3237ss7788c	578				X
		TMS60444	RME1_A2	S3237ss7788d	567				X
		TMS60444	RME1_A2	S3237ss7788e	574				X
		TMS60444	RME1	S3531ss8455	946			X
		TMS60444	RME1_A1	S3531ss8455	880				X
		TMS60444	RME1_A2	S3531ss8455	622				X
		TMS60444	RME1	S3793ss9016	720
		TMS60444	RME1_A2	S3793ss9016a	585				X
		TMS60444	RME1_A2	S3793ss9016b	638				X
		TMS60444	RME1_A2	S3793ss9016c	666				X
		TMS60444	RME1	S3813ss9066	949			X
		TMS60444	RME1_A2	S3813ss9066	648				X
		TMS60444	RME1	S3813ss9066	568			X
		TMS60444	NS158	S3813ss9066	129			X
		TMS60444	SSRY28	S3899ss9253	164	Iib		X	X
		TMS60444	NS169	S3938ss9338	327	I	X	X	X
		TMS60444	RME1_A2	S3938ss9338a	569				X
		TMS60444	RME1_A2	S3938ss9338b	602				X
		TMS60444	RME1_A2	S3938ss9338c	605				X
		TMS60444	RME1_A2	S3938ss9338d	570				X
		TMS60444	RME1	S3ss106	416
		TMS60444	SSRY28	S3ss106	92	IV		X
		TMS60444	SSRY28	S3ss106	92	IV		X
		TMS60444	RME1_A2	S4ss126a	651				X
		TMS60444	RME1_A2	S4ss126b	635				X
		TMS60444	RME1_A2	S4ss126c	636				X
		TMS60444	RME1_A1	S7ss175	929				X
		TMS60444	RME1	S7ss175	906			X
		TMS60444	RME1	S7ss175	755			X
		TMS60444	NS169	S7ss175	324	I	X	X	X
		TMS60444	NS169	S7ss175	323	I	X	X	X
		TMS60444	NS169	S7ss175	322	I	X	X	X
		TMS60444	NS169	S7ss175	321	I	X	X	X
		TMS60444	SSRY40	S842ss2460	236	Ia		X	X
		TMS60444	RME1_A2	S8ss202a	662				X
		TMS60444	RME1_A2	S8ss202b	627				X
		TMS60444	RME1_A2	SS100001	552				X
		TMS60444	SSRY40	SS100001	229			X	X
		TMS60444	RME1_A2	SS100002	605				X
		TMS60444	RME1_A2	SS100006	610				X
		TMS60444	RME1_A2	SS100007	594				X
		TMS60444	RME1_A2	SS100014	578				X
		TMS60444	RME1_A1	SS100015	927				X
		TMS60444	RME1_A1	SS100018	921				X
		TMS60444	RME1_A2	SS100018	662				X
		TMS60444	RME1_A2	SS100018	630				X
		TMS60444	RME1_A2	SS100018	606				X
		TMS60444	RME1	SS100020	946			X
		TMS60444	RME1_A2	SS100022	608				X
		TMS60444	RME1_A1	SS100025	875				X
		TMS60444	RME1_A2	SS100028	618				X
		TMS60444	RME1	SS100028	562			X
		TMS60444	RME1	SS100032	407			X
		TMS60444	RME1_A2	SS100039	551				X
		TMS60444	NS158	SS100051	301			X	X
		TMS60444	SSRY28	SS100051	167	Iia		X	X
		TMS60444	NS158	SS100051	147	III	X	X	X
		TMS60444	RME1_A2	SS100068	548				X
		TMS60444	NS198	SS100255	194	Ib	X	X	X
		TMS60444	RME1_A1	SS4632	942	II	X	X	X
		TMS60444	RME1_A2	SS4632	657				X
		TMS60444	NS158	SS4632	138	IV	X	X	X
		TMS60444	SSRY28	SS4632	138	III		X	X
		TMS60444	NS169	SS4632a	328	I	X	X	X
		TMS60444	NS158	SS4632b	304			X	X
		TMS60444	RME1_A2	SS8162	611				X
		TMS60444	RME1	Chr17	673			X

## Sheet: Table S8
		Table S8: Non coding RNAs associated with sequence homology to the RME1-A1 marker allele
		Name	ncRNA type	target	Ontology	Match significance (e value)
		mes-miR156	miRNA	Squamosa Promoter-Binding-like protein (SBP)	Regulation of reactive oxidation species and hormone pathways	0.92
		mes-miR166	miRNA	Homeodomain Leucine-Zipper (HD-ZIPIII)	Regulation of root development and biotic stress responses	1.6
		mes-miR167	miRNA	Auxin response factor 8 (ARF8)	Regulation of auxin signalling and adaptive responses to stress	5.1
		mes-miR168	miRNA	Protein Argonaute 1 (AGO1)	Regulation and adaptive responses to stress	9.1
		mes-miR169	miRNA	Transcription factor NF-Y alpha-related	Adaptive responses to abiotic and biotic stress	9.1
		mes-miR172	miRNA	APETALA2 (AP2)	Regulation of gene expression in response to stress factors	3.5
		mes-miR396	miRNA	Protein unusual floral organs	floral organ development, plant hormonal signal transduction and adaptive responses to stress	2.4
		mes-miR482	miRNA	NB-Leucine-Rich Repeat containing protein	Disease resistance genes	6.2
		Manes.10G126666.1	lncRNA			6.47157e-39
		Manes.08G085000.15	lncRNA			9.60467e-37
		Manes.08G089240.1	lncRNA			7.38406e-32
		Manes.06G036350.1	lncRNA			8.99563e-31
		Manes.11G091136.1	lncRNA			2.94069e-24
		Manes.17G018861.1	lncRNA			2.11744e-13
		Manes.05G057100.3	lncRNA			9.00357e-12
		Manes.10G000157.1	lncRNA			3.14256e-11
		Manes.07G082310.6	lncRNA			6.92194e-07
		Manes.07G082310.5	lncRNA			6.92194e-07
		Manes.07G082310.4	lncRNA			6.92194e-07
		Manes.07G082310.3	lncRNA			6.92194e-07
		Manes.12G089294.1	lncRNA			0.00125152

## Sheet: Table_S9
		Table S9: PCR primers
		Target	F Primer	R Primer	Reference
		NS158	GTGCGAAATGGAAATCAATG	GCCTTCTCAGCATATGGAGC	Okogbenin et al., 2007
		NS169	TGCAGCATATCAGGCATTTC	TGGAAGCATGCATCAAATGT	Okogbenin et al., 2007
		NS198	TGCATCATGGTCCACTCACT	CATTCTTTTCGGCATTCCAT	Okogbenin et al., 2012
		SSRy40	ATGTTAATGTAATGAAAGAGC	AGAAGAGGGTAGGAGTTATGT	Mba et al., 2001
		SSRY28	TTGACATGAGTGATATTTTCTTGAG	GCTGCGTGCAAAACTAAAAT	Mba et al., 2001
		PDCD7	GAAATGCGTGCAAAGGAGCA	GGCAATCTCCCTAGCCATCC	NA
		PP2A-B'δ	GGAATCAGGTGGTCCAGAGC	CATGTCCTCTGCCTTTGCTTC	NA
		HMBG1	ATCCAAAGCCATGAGGGGAC	TCGAGCTGAGTTCTTCTTGCT	NA
		LOC128695772	TGAGCCAGCTGCTTCAGAGT	GACTTTACTTCACTCTGGCCGA	NA
		AV1 capsid protein gene	GCCCATGTACCGAAAGCCCAGAAT	GGATTAGAGGCATGCGTACATGCC	NA
		UBQ10/PUBQ3	TGCATCTCGTTCTCCGATTG	GGGAAGATCAGTCGTTGTTGG	Hu et al., 2016
		PP2A	TGCAAGGCTCACACTTTCATC	CTGAGCGTAAAGCAGGGAAG	Hu et al., 2016
